# Supplementary material for: Acidithiobacillia class members originating at sites within the Pacific Ring of Fire and other tectonically active locations and description of the novel genus ‘Igneacidithiobacillus’
Source: Front Microbiol. 2024 Apr 3;15:1360268. doi: 10.3389/fmicb.2024.1360268 (PMC11021618; doi:10.3389/fmicb.2024.1360268)
Supplement: Supplementary file 7 [file Table_6.XLSX]

## Sheet: Table S6
Protein Family (PF)	Gene Name	Function	Pathway	KEGG	Species	Ca. I. copahuensis YTS05	Ca. I. copahuensis BN09-2	Ca. I. copahuensis VAN18-1	Ca. I. copahuensis VAN18-2	Ca. I. copahuensis VAN18-4	Ca. I. copahuensis CV18-2	Ca. I. copahuensis CV18-3	Ca. I. Yellowstonensis SpSt-908	Ca. I. siniensis S30A2	Ca. I. taiwanensis UBA2486	Ca. I. taiwanensis TVZ_G2	Ca. I. chanchocoensis mCHCt20-1	Ca. I. tapuoensis TVZ_G3	Ca. I. waiarikiensis TVZ_G4	Protein_ID	.
					Acronym	ICO	ICO	ICO	ICO	ICO	ICO	ICO	IYE	ISI	ITA	ITA	ICH	ICH	IWA		.
					Total	107	107	107	107	107	107	107	107	102	107	102	102	107	106		.
					Selected																.
26	pgsA	CDP-diacylglycerol---glycerol-3-phosphate 3-phosphatidyltransferase [EC:2.7.8.5]	Metabolism; Lipid metabolism; Glycerophospholipid metabolism	K00995	-	1	1	1	1	1	1	1	1	1	1	1	1	1	0	HF921_12490;OYV73121.1;HF281_07485;AIA55511.1;HAP97_05565;HFV02_01145;HAQ03_13935;HAQ00_01365;OFC35409.1;HAP98_02500;HAP96_15140;HAP99_10735;HF288_10710;QER44924.1;AUW33052.1;OFC55761.1;AEK58469.1;HAQ02_00700;OFC37309.1;OFC39611.1;HFU97_09315;HFU84_06055;HFU87_06725;HFQ13_03905;HFU75_11570;HFV00_09790;RNF68133.1;ACK79256.1;PZD81988.1;ACH83226.1;WP_012536397.1;HF282_06255;fig|6666666.521345.peg.38…	.
72	orn	oligoribonuclease [EC:3.1.-.-]	Genetic Information Processing; Translation; Ribosome biogenesis in eukaryotes | Brite Hierarchies; Protein families: genetic information processing; Messenger RNA biogenesis | Brite Hierarchies; Protein families: genetic information processing; Ribosome biogenesis	K13288	-	1	1	1	1	1	1	1	1	1	1	1	1	1	0	HF281_04640;AIA54583.1;HAP97_11935;HFV02_00895;HAQ03_01665;HAQ00_08810;OFC30555.1;HAP98_04780;HAP96_11620;HAP99_07420;HF288_04970;QER44297.1;AUW32073.1;OFC60920.1;AEK57322.1;HAQ02_05650;OFC38981.1;OFC36437.1;HFU97_02715;HFU84_01090;HFU87_01220;HFQ13_11595;HFU75_03025;HFV00_04340;RNF76728.1;ACK78112.1;PZD80073.1;ACH84176.1;WP_163058401.1;HF282_07665;fig|6666666.521345.peg.2299;HMI48_04075;WP_01253…	.
1	ispF	2-C-methyl-D-erythritol 2,4-cyclodiphosphate synthase [EC:4.6.1.12]	Metabolism; Metabolism of terpenoids and polyketides; Terpenoid backbone biosynthesis	K01770	-	1	1	1	1	1	1	1	1	1	1	1	1	0	1	HF281_08350;AIA56174.1;HAP97_05070;HFV02_04955;HAQ03_02355;HAQ00_05620;OFC36692.1;HAP98_11620;HAP96_07830;HAP99_12605;HF288_13490;QER43968.1;AUW33519.1;OFC41266.1;AEK59131.1;HAQ02_10930;OFC35089.1;OFC41382.1;HFU97_02360;HFU84_09755;HFU87_14315;HFQ13_04600;HFU75_04170;HFV00_13660;RNF60737.1;ACK80113.1;PZD82621.1;ACH82795.1;WP_163059302.1;HF282_18505;fig|6666666.521345.peg.2310;HMI48_17525;EGQ64288…	.
92	lexA	repressor LexA [EC:3.4.21.88]	Brite Hierarchies; Protein families: metabolism; Peptidases | Brite Hierarchies; Protein families: genetic information processing; DNA repair and recombination proteins	K01356	74	1	1	1	1	1	1	1	1	1	1	1	1	0	0	HF920_01590;HF923_12865;QER44745.1;AUW34133.1;AEK59563.1;HF281_07425;AIA55339.1;HAP97_06710;HFV02_02915;HAQ03_00660;HAQ00_04200;OFC29611.1;HAP98_00515;HAP96_01315;HAP99_00105;HF288_07510;QER45974.1;AUW32967.1;OFC54724.1;AEK58371.1;HAQ02_08875;OFC36082.1;OFC39860.1;HFU97_06445;HFU84_13785;HFU87_13890;HFQ13_13755;HFU75_13125;HFV00_01310;RNF57799.1;ACK78330.1;PZD81531.1;ACH83765.1;WP_009568876.1;HF2…	.
49	hyp	hypothetical protein	Not Included in Pathway or Brite; Poorly characterized; General function prediction only	TIGR00079	-	1	1	1	1	1	1	1	1	1	1	1	0	1	1	HF281_08735;AIA56057.1;HAP97_04995;HFV02_05880;HAQ03_14320;HAQ00_11075;OFC38891.1;HAP98_07325;HAP96_12655;HAP99_01440;HF288_11115;QER45571.1;AUW33407.1;OFC60604.1;AEK59008.1;HAQ02_07735;OFC40227.1;OFC41503.1;HFU97_05215;HFU84_13545;HFU87_08440;HFQ13_08690;HFU75_00755;HFV00_00950;RNF67894.1;ACK79200.1;PZD80603.1;ACH84393.1;WP_009567485.1;HF282_03245;HMI48_06720;WP_009567485.1;HF290_04420;WP_009567…	.
50	hyp	hypothetical protein	Not Included in Pathway or Brite; Poorly characterized; General function prediction only	PRK10204	-	1	1	1	1	1	1	1	1	1	1	1	0	1	1	HF281_07870;AIA56023.1;HAP97_09730;HFV02_09025;HAQ03_05845;HAQ00_10580;OFC38093.1;HAP98_01470;HAP96_12620;HAP99_03875;HF288_10340;QER44155.1;AUW33375.1;OFC58381.1;AEK58974.1;HAQ02_12205;OFC39690.1;OFC42180.1;HFU97_13525;HFU84_04190;HFU87_08815;HFQ13_11300;HFU75_02730;HFV00_05740;RNF63531.1;ACK80480.1;PZD80575.1;ACH84361.1;WP_163054087.1;HF282_04980;HMI48_06565;WP_009562417.1;HF290_04575;WP_009562…	.
59	cysL	LysR family transcriptional regulator, transcriptional activator of the cysJI operon	Brite Hierarchies; Protein families: genetic information processing; Transcription factors	K21900	-	1	1	1	1	1	1	1	1	1	1	1	0	1	1	HF281_08000;AIA56025.1;HAP97_09720;HFV02_09015;HAQ03_05855;HAQ00_10570;OFC38095.1;HAP98_01460;HAP96_12610;HAP99_03865;HF288_10330;QER44153.1;AUW33377.1;OFC58379.1;AEK58976.1;HAQ02_12195;OFC39692.1;OFC42178.1;HFU97_13515;HFU84_04200;HFU87_08825;HFQ13_11290;HFU75_02720;HFV00_05750;RNF63533.1;ACK77990.1;PZD80577.1;ACH84363.1;WP_163054083.1;HF282_04990;fig|6666666.521345.peg.4244;HMI48_06575;EGQ61989…	.
61	aguB	N-carbamoylputrescine amidase [EC:3.5.1.53]	Metabolism; Amino acid metabolism; Arginine and proline metabolism	K12251	-	1	1	1	1	1	1	1	1	1	1	1	0	1	1	NDU42373.1;QFG79751.1;HF561_05045;HF563_16140;HF568_08625;HF639_11215;BBF65347.1;HJG40_13910;HF281_07855;AIA56020.1;HAP97_09745;HFV02_09040;HAQ03_05830;HAQ00_10595;OFC38090.1;HAP98_01485;HAP96_12635;HAP99_03890;HF288_10355;QER44158.1;AUW33372.1;OFC58384.1;AEK58971.1;HAQ02_12220;OFC36848.1;OFC42183.1;HFU97_13540;HFU84_04175;HFU87_08800;HFQ13_11315;HFU75_02745;HFV00_05725;RNF63527.1;ACK79721.1;PZD8…	.
102	trx	thiol reductase thioredoxin	Not Included in Pathway or Brite; Unclassified: metabolism; Enzymes with EC numbers	K03671	-	1	1	1	1	1	1	1	1	1	1	1	0	1	1	HF281_04205;AIA56097.1;HAP97_03965;HFV02_01560;HAQ03_06065;HAQ00_06925;OFC38911.1;HAP98_13740;HAP96_00410;HAP99_03030;HF288_08600;QER45988.1;AUW34074.1;OFC42797.1;AEK59049.1;HAQ02_07805;OFC30494.1;OFC42025.1;HFU97_01475;HFU84_03920;HFU87_00015;HFQ13_01140;HFU75_10350;HFV00_07025;RNF70141.1;ACK78823.1;PZD80633.1;ACH84423.1;WP_012537279.1;HF282_06115;HMI48_06870;WP_012537279.1;HF290_04270;WP_012537…	.
74	yhfA	putative redox protein	Not Included in Pathway or Brite; Unclassified: genetic information processing; Protein processing	K07397	-	1	1	1	1	1	1	1	1	1	1	0	1	1	1	HF283_06430;HF283_06530;HF561_13310;HF568_07475;HF639_00175;BBF66286.1;BBF66463.1;QFX95792.1;QFX96012.1;HF561_09950;HF568_12160;HF639_09795;HF563_16155;HF641_08540;HF281_10705;AIA53970.1;HAP97_10600;HFV02_11710;HAQ03_12195;HAQ00_13515;OFC28922.1;HAP98_10985;HAP96_14975;HAP99_08065;HF288_01230;QER45704.1;AUW31645.1;OFC62982.1;AEK56734.1;HAQ02_12710;OFC38036.1;OFC37184.1;HFU97_03510;HFU84_02730;HFU…	.
52	trpC	indole-3-glycerol phosphate synthase [EC:4.1.1.48]	Metabolism; Amino acid metabolism; Phenylalanine, tyrosine and tryptophan biosynthesis	K01609	-	1	1	1	1	1	1	1	1	1	1	0	1	1	1	HF283_00215;HF283_06435;HF281_10700;AIA53969.1;HAP97_10605;HFV02_11705;HAQ03_12200;HAQ00_13510;OFC28923.1;HAP98_10990;HAP96_14980;HAP99_08060;HF288_01225;QER45703.1;AUW31644.1;OFC62981.1;AEK56733.1;HAQ02_12705;OFC38035.1;OFC37185.1;HFU97_03505;HFU84_02725;HFU87_03820;HFQ13_02360;HFU75_06085;HFV00_06435;RNF63776.1;ACK80131.1;PZD80302.1;ACH85028.1;WP_009567143.1;HF282_16570;fig|6666666.521345.peg.1…	.
18	trpG	anthranilate synthase component II [EC:4.1.3.27]	Metabolism; Amino acid metabolism; Phenylalanine, tyrosine and tryptophan biosynthesis | Metabolism; Biosynthesis of other secondary metabolites; Phenazine biosynthesis | Cellular Processes; Cellular community - prokaryotes; Quorum sensing | Cellular Processes; Cellular community - prokaryotes; Biofilm formation - Pseudomonas aeruginosa	K01658	-	1	1	1	1	1	1	1	1	1	1	0	1	1	1	OAP87227.1;HAP94_17430;HF281_10690;AIA53967.1;HAP97_10615;HFV02_11695;HAQ03_12210;HAQ00_13500;OFC28925.1;HAP98_11000;HAP96_14990;HAP99_08050;HF288_01215;QER45701.1;AUW31642.1;OFC39857.1;AEK56731.1;HAQ02_12695;OFC38033.1;OFC37187.1;HFU97_03495;HFU84_02715;HFU87_03830;HFQ13_02370;HFU75_06075;HFV00_06425;RNF63778.1;ACK78895.1;PZD80304.1;ACH85030.1;WP_163056369.1;HF282_05245;HMI48_11790;EGQ63080.1;WP…	.
8	ispH	4-hydroxy-3-methylbut-2-en-1-yl diphosphate reductase [EC:1.17.7.4]	Metabolism; Metabolism of terpenoids and polyketides; Terpenoid backbone biosynthesis	K03527	-	1	1	1	1	1	1	1	1	1	1	0	1	1	1	HF281_10120;AIA53954.1;HAP97_10675;HFV02_11635;HAQ03_12270;HAQ00_13440;OFC28937.1;HAP98_11060;HAP96_04090;HAP99_07990;HF288_04780;QER45688.1;AUW31630.1;OFC43027.1;AEK56718.1;HAQ02_12635;OFC38021.1;OFC37199.1;HFU97_03435;HFU84_02655;HFU87_03890;HFQ13_02430;HFU75_06015;HFV00_06365;RNF63790.1;ACK77946.1;PZD80317.1;ACH85043.1;WP_163056346.1;HF282_00800;fig|6666666.521345.peg.2390;HMI48_11855;EGQ62694…	.
99	tpr	tetratricopeptide repeat protein	Not Included in Pathway or Brite; Poorly characterized; General function prediction only	COG2976	-	1	1	1	1	1	1	1	1	1	1	0	1	1	1	HF281_02985;AIA55008.1;HAP97_07310;HFV02_08615;HAQ03_14405;HAQ00_00040;OFC32739.1;HAP98_11985;HAP96_00975;HAP99_02940;HF288_06510;QER44773.1;AUW32680.1;OFC43847.1;AEK58020.1;HAQ02_00485;OFC40358.1;OFC37273.1;HFU97_06825;HFU84_00500;HFU87_02320;HFQ13_10030;HFU75_03865;HFV00_12615;RNF60582.1;ACK78205.1;PZD79742.1;ACH83829.1;WP_163055299.1;HF282_19120;HMI48_02310;WP_012536847.1;HF290_02310;WP_012536…	.
106	tcdA	tRNA threonylcarbamoyladenosine dehydratase	Brite Hierarchies; Protein families: genetic information processing; Transfer RNA biogenesis	K22132	43	1	1	1	1	1	1	1	1	1	1	0	1	1	1	HF292_01080;WP_010641639.1;HF669_07785;HF920_10395;HF281_08145;AIA55371.1;HAP97_02790;HFV02_02790;HAQ03_00830;HAQ00_04030;OFC29536.1;HAP98_05205;HAP96_06600;HAP99_01915;HF288_02285;QER45941.1;AUW32998.1;OFC52803.1;AEK58403.1;HAQ02_08705;OFC30016.1;OFC35461.1;HFU97_13675;HFU84_12965;HFU87_09570;HFQ13_04395;HFU75_12060;HFV00_01875;RNF68407.1;ACK79950.1;PZD81300.1;ACH84233.1;WP_163054131.1;HF282_110…	.
27	aroC	chorismate synthase [EC:4.2.3.5]	Metabolism; Amino acid metabolism; Phenylalanine, tyrosine and tryptophan biosynthesis	K01736	-	1	1	1	1	1	1	1	1	0	1	1	1	1	1	HF281_10355;AIA55838.1;HAP97_14070;HFV02_07750;HAQ03_09075;HAQ00_12810;OFC32293.1;HAP98_14045;HAP96_08260;HAP99_07810;HF288_08695;QER45073.1;AUW33215.1;OFC62254.1;AEK58802.1;HAQ02_09700;OFC39559.1;OFC39425.1;HFU97_04010;HFU84_08045;HFU87_03955;HFQ13_12960;HFU75_05290;HFV00_10270;RNF58257.1;ACK79724.1;PZD79999.1;ACH83862.1;WP_163057527.1;HF282_13565;fig|6666666.521345.peg.3882;HMI48_02490;EGQ61118…	.
43	gcvT	aminomethyltransferase [EC:2.1.2.10]	Metabolism; Carbohydrate metabolism; Glyoxylate and dicarboxylate metabolism | Metabolism; Amino acid metabolism; Glycine, serine and threonine metabolism | Metabolism; Metabolism of cofactors and vitamins; One carbon pool by folate	K00605	-	1	1	1	1	1	1	1	1	0	1	1	1	1	1	EGQ63946.1;HF292_00820;HF561_14470;HF920_09460;HF281_12600;AIA54767.1;HAP97_12595;HFV02_09500;HAQ03_14495;HAQ00_08165;OFC32336.1;HAP98_09875;HAP96_04270;HAP99_12105;HF288_03695;QER43706.1;AUW32259.1;OFC58839.1;AEK57560.1;HAQ02_07215;OFC36467.1;OFC41161.1;HFU97_09400;HFU84_05970;HFU87_06640;HFQ13_03820;HFU75_11485;HFV00_09875;RNF67967.1;ACK80916.1;PZD81887.1;ACH83335.1;WP_163058771.1;HF282_11870;f…	.
78	def	peptide deformylase [EC:3.5.1.88]	Not Included in Pathway or Brite; Unclassified: metabolism; Enzymes with EC numbers	K01462	38	1	1	1	1	1	1	1	0	1	1	1	1	1	1	HF281_00570;AIA56118.1;HAP97_04640;HFV02_09430;HAQ03_08585;HAQ00_07040;OFC29635.1;HAP98_11910;HAP96_11665;HAP99_12485;HF288_11565;QER44358.1;AUW33467.1;OFC61838.1;AEK59074.1;HAQ02_06075;OFC30142.1;OFC37784.1;HFU97_01440;HFU84_14015;HFU87_04380;HFQ13_01200;HFU75_10410;HFV00_05445;RNF67642.1;ACK79594.1;PZD82566.1;ACH82854.1;WP_163056613.1;HF282_09055;fig|6666666.521345.peg.5284;HMI48_17200;EGQ62440…	.
11	rplS	large subunit ribosomal protein L19	Genetic Information Processing; Translation; Ribosome | Brite Hierarchies; Protein families: genetic information processing; Ribosome	K02884	-	1	0	0	0	0	0	0	1	0	1	1	1	1	1	HF292_08750;HF281_06290;AIA54465.1;HAP97_11200;HFV02_08765;HAQ03_06175;HAQ00_03780;OFC33157.1;HAP98_12065;HAP96_00560;HAP99_07530;HF288_04465;QER45836.1;AUW31978.1;OFC41670.1;AEK57221.1;HAQ02_05210;OFC39387.1;OFC40117.1;HFU97_03300;HFU84_05410;HFU87_03145;HFQ13_09490;HFU75_04380;HFV00_08615;RNF67687.1;ACK77837.1;PZD80858.1;ACH84668.1;WP_009564594.1;HF282_01830;fig|6666666.521345.peg.3486;HMI48_08…	.
103	infC	translation initiation factor IF-3	Brite Hierarchies; Protein families: genetic information processing; Translation factors | Brite Hierarchies; Protein families: genetic information processing; Mitochondrial biogenesis	K02520	-	1	0	0	0	0	0	0	1	0	1	1	1	1	1	OYV78872.1;OYV81768.1;HF281_03760;AIA56244.1;HAP97_06490;HFV02_14920;HAQ03_04095;HAQ00_05970;OFC39255.1;HAP98_08935;HAP96_08570;HAP99_00335;HF288_01290;QER43834.1;AUW33587.1;OFC61064.1;AEK59201.1;HAQ02_09260;OFC40279.1;OFC40959.1;HFU97_00285;HFU84_03180;HFU87_05010;HFQ13_10340;HFU75_08120;HFV00_03765;RNF58806.1;ACK80655.1;PZD80653.1;ACH84445.1;WP_012537293.1;HF282_10230;fig|6666666.521345.peg.395…	.
10	rplJ	large subunit ribosomal protein L10	Genetic Information Processing; Translation; Ribosome | Brite Hierarchies; Protein families: genetic information processing; Ribosome	K02864	34	1	0	0	0	0	0	0	1	1	1	1	1	1	1	OYV73759.1;HF281_04035;AIA54489.1;HAP97_05210;HFV02_10450;HAQ03_03025;HAQ00_11220;OFC38755.1;HAP98_12575;HAP96_07175;HAP99_08675;HF288_11885;QER44613.1;AUW31999.1;OFC61298.1;AEK57245.1;HAQ02_12970;OFC30459.1;OFC41928.1;HFU97_12320;HFU84_08400;HFU87_05815;HFQ13_05620;HFU75_01085;HFV00_10875;RNF68376.1;ACK79207.1;PZD82672.1;ACH82742.1;WP_009568780.1;HF282_01665;fig|6666666.521345.peg.3441;HMI48_177…	.
96	hfq	host factor-I protein	Genetic Information Processing; Folding, sorting and degradation; RNA degradation | Cellular Processes; Cellular community - prokaryotes; Quorum sensing | Cellular Processes; Cellular community - prokaryotes; Biofilm formation - Vibrio cholerae | Brite Hierarchies; Protein families: genetic information processing; Messenger RNA biogenesis | Brite Hierarchies; Protein families: genetic information…	K03666	7	1	0	0	0	0	0	0	1	1	1	1	1	1	1	HF281_08320;AIA55406.1;HAP97_02615;HFV02_12655;HAQ03_01005;HAQ00_03855;OFC29565.1;HAP98_08560;HAP96_06425;HAP99_10700;HF288_02460;QER45906.1;AUW33028.1;OFC55751.1;AEK58438.1;HAQ02_08530;OFC29987.1;OFC35491.1;HFU97_08140;HFU84_00565;HFU87_02385;HFQ13_10095;HFU75_03930;HFV00_12550;RNF60460.1;ACK78293.1;PZD81515.1;ACH83781.1;WP_009561005.1;HF282_18905;fig|6666666.521345.peg.312;HMI48_02065;EGQ60680.…	.
80	ppiB	peptidyl-prolyl cis-trans isomerase B (cyclophilin B) [EC:5.2.1.8]	Brite Hierarchies; Protein families: genetic information processing; Chaperones and folding catalysts	K03768	86	1	1	1	1	1	1	1	1	1	1	1	1	1	1	HF281_02730;AIA56140.1;HAP97_13305;HFV02_08880;HAQ03_08695;HAQ00_07150;OFC29761.1;HAP98_07965;HAP96_10835;HAP99_04860;HF288_10130;QER44380.1;AUW33489.1;OFC44541.1;AEK59096.1;HAQ02_09870;OFC39530.1;OFC41827.1;HFU97_11065;HFU84_05470;HFU87_12270;HFQ13_00310;HFU75_04715;HFV00_00005;RNF58248.1;ACK79728.1;PZD79988.1;ACH83877.1;WP_163057511.1;HF282_05870;fig|6666666.521345.peg.1843;HMI48_02545;WP_01253…	.
100	ybbN	putative thioredoxin	Brite Hierarchies; Protein families: genetic information processing; Chaperones and folding catalysts	K05838	77	1	1	1	1	1	1	1	1	1	1	1	1	1	1	EGQ64068.1;OYV82153.1;HGE67881.1;HF281_06265;AIA54470.1;HAP97_11225;HFV02_08790;HAQ03_06200;HAQ00_03755;OFC32946.1;HAP98_12300;HAP96_00535;HAP99_07505;HF288_04440;QER45841.1;AUW31983.1;OFC41860.1;AEK57226.1;HAQ02_00200;OFC39391.1;OFC40121.1;HFU97_03325;HFU84_05385;HFU87_03170;HFQ13_09515;HFU75_04355;HFV00_08640;RNF76719.1;ACK79451.1;PZD80854.1;ACH84664.1;WP_163054379.1;HF282_16120;HMI48_08090;WP_…	.
70	grpE	molecular chaperone GrpE	Brite Hierarchies; Protein families: genetic information processing; Chaperones and folding catalysts | Brite Hierarchies; Protein families: genetic information processing; Mitochondrial biogenesis	K03687	18	1	1	1	1	1	1	1	1	1	1	1	1	1	1	HF281_03260;AIA56196.1;HAP97_07375;HFV02_14165;HAQ03_04340;HAQ00_05730;OFC34834.1;HAP98_06020;HAP96_04230;HAP99_09655;HF288_00015;QER43946.1;AUW33540.1;OFC61103.1;AEK59153.1;HAQ02_11040;OFC31472.1;OFC38544.1;HFU97_02250;HFU84_09645;HFU87_14425;HFQ13_04710;HFU75_04060;HFV00_13550;RNF60759.1;ACK80271.1;PZD80697.1;ACH84493.1;WP_163054185.1;HF282_17020;fig|6666666.521345.peg.4690;HMI48_07220;EGQ61459…	.
39	hscB	molecular chaperone HscB	Brite Hierarchies; Protein families: genetic information processing; Chaperones and folding catalysts | Brite Hierarchies; Protein families: genetic information processing; Mitochondrial biogenesis	K04082	39	1	1	1	1	1	1	1	1	1	1	1	1	1	1	HF281_11020;AIA54690.1;HAP97_15010;HFV02_12380;HAQ03_10440;HAQ00_04605;OFC29728.1;HAP98_13380;HAP96_14300;HAP99_05300;HF288_09115;QER43470.1;AUW33940.1;OFC61139.1;AEK57479.1;HAQ02_05865;OFC36800.1;OFC37710.1;HFU97_06620;HFU84_00295;HFU87_02115;HFQ13_09825;HFU75_03660;HFV00_12820;RNF60571.1;ACK80922.1;PZD82252.1;ACH83075.1;WP_163054880.1;HF282_04800;fig|6666666.521345.peg.2853;HMI48_16090;EGQ62552…	.
77	parA	chromosome partitioning protein	Brite Hierarchies; Protein families: genetic information processing; Chromosome and associated proteins | Brite Hierarchies; Protein families: signaling and cellular processes; Cytoskeleton proteins	K03496	17	1	1	1	1	1	1	1	1	1	1	1	1	1	1	EGQ64166.1;HAP67_06230;HF283_13000;HF281_05845;HF281_08405;AIA54059.1;AIA55687.1;HAP97_01150;HAP97_06300;HFV02_00775;HFV02_03860;HFV02_04325;HAQ03_02790;HAQ03_13730;HAQ00_10220;HAQ00_11585;OFC37010.1;OFC38459.1;HAP98_02825;HAP98_15060;HAP96_07445;HAP96_15200;HAP99_03090;HAP99_11690;HF288_02125;HF288_09990;HF288_12930;QER44782.1;QER44976.1;AUW32544.1;AEK56751.1;AEK57854.1;HAQ02_07985;HAQ02_11595;O…	.
54	ihfA	integration host factor subunit alpha	Brite Hierarchies; Protein families: genetic information processing; DNA replication proteins | Brite Hierarchies; Protein families: genetic information processing; Chromosome and associated proteins | Brite Hierarchies; Protein families: genetic information processing; DNA repair and recombination proteins	K04764	69	1	1	1	1	1	1	1	1	1	1	1	1	1	1	EGQ64253.1;HF283_05665;HF292_10475;HF561_06625;HF568_17095;HF639_05145;BBF66376.1;HF563_02555;HF668_10915;HF668_11710;WP_077272987.1;OFC37868.1;OFC37748.1;OFC37636.1;HJG40_14160;HF920_05040;HF923_10675;CDQ09168.1;SMH64838.1;HAP94_02225;HAP94_22185;HAP94_23090;HAP94_25300;CDQ08891.1;SMH64189.1;AEM46928.1;AEM48079.1;OYV75062.1;HF281_03785;AIA56249.1;HAP97_06465;HFV02_14895;HAQ03_04070;HAQ00_05995;O…	.
94	rbfA	ribosome-binding factor A	Brite Hierarchies; Protein families: genetic information processing; Ribosome biogenesis	K02834	66	1	1	1	1	1	1	1	1	1	1	1	1	1	1	OYV73525.1;HF281_02655;AIA56155.1;HAP97_13230;HFV02_08955;HAQ03_08770;HAQ00_07225;OFC29775.1;HAP98_07890;HAP96_10910;HAP99_04785;HF288_10055;QER44395.1;AUW33503.1;OFC57152.1;AEK59111.1;HAQ02_09945;OFC36665.1;OFC35311.1;HFU97_03945;HFU84_06555;HFU87_09400;HFQ13_00100;HFU75_04925;HFV00_11050;RNF62849.1;ACK78965.1;PZD82606.1;ACH82810.1;WP_163056676.1;HF282_04270;fig|6666666.521345.peg.3152;HMI48_174…	.
2	rlmB	23S rRNA (guanosine2251-2'-O)-methyltransferase [EC:2.1.1.185]	Brite Hierarchies; Protein families: genetic information processing; Ribosome biogenesis	K03218	84	1	1	1	1	1	1	1	1	1	1	1	1	1	1	WP_075322386.1;CDQ09243.1;OYV71616.1;HF281_02510;AIA55799.1;HAP97_01790;HFV02_09215;HAQ03_09765;HAQ00_11965;OFC36636.1;HAP98_04280;HAP96_02635;HAP99_02335;HF288_10860;QER43793.1;AUW33162.1;OFC61461.1;AEK58604.1;HAQ02_05420;OFC38940.1;OFC39657.1;HFU97_02840;HFU84_01215;HFU87_01345;HFQ13_11720;HFU75_03150;HFV00_04465;RNF58243.1;ACK80661.1;PZD81879.1;ACH83347.1;WP_163058790.1;HF282_17625;fig|6666666…	.
98	ybeY	probable rRNA maturation factor	Brite Hierarchies; Protein families: genetic information processing; Ribosome biogenesis	K07042	23	1	1	1	1	1	1	1	1	1	1	1	1	1	1	OYV73102.1;HF281_05800;AIA54435.1;HAP97_05430;HFV02_01420;HAQ03_05450;HAQ00_06695;OFC34872.1;HAP98_10020;HAP96_01480;HAP99_07635;HF288_08960;QER43295.1;AUW31950.1;OFC48762.1;AEK57184.1;HAQ02_13455;OFC39928.1;OFC38147.1;HFU97_14240;HFU84_02105;HFU87_02750;HFQ13_06350;HFU75_00435;HFV00_08510;RNF60324.1;ACK79286.1;PZD82924.1;ACH83000.1;WP_163057450.1;HF282_15970;fig|6666666.521345.peg.3160;HMI48_164…	.
60	merR	MerR family transcriptional regulator	Brite Hierarchies; Protein families: genetic information processing; Transcription factors	COG0789	70	1	1	1	1	1	1	1	1	1	1	1	1	1	1	HF281_03790;AIA56250.1;HAP97_06460;HFV02_14890;HAQ03_04065;HAQ00_06000;OFC39249.1;HAP98_14510;HAP96_08540;HAP99_12300;HF288_01260;QER43840.1;AUW33593.1;OFC61379.1;AEK59207.1;HAQ02_05065;OFC40273.1;OFC40965.1;HFU97_00315;HFU84_03150;HFU87_04980;HFQ13_10370;HFU75_08090;HFV00_03795;RNF58798.1;ACK78976.1;PZD80647.1;ACH84439.1;WP_163058213.1;HF282_10200;HMI48_06940;WP_009567032.1;HF290_16425;WP_009567…	.
97	rpoH	RNA polymerase sigma-32 factor	Brite Hierarchies; Protein families: genetic information processing; Transcription machinery	K03089	57	1	1	1	1	1	1	1	1	1	1	1	1	1	1	HF283_13340;HF283_18180;HF563_14125;HF281_04870;AIA54389.1;HAP97_04815;HFV02_13260;HAQ03_12595;HAQ00_03155;OFC29673.1;HAP98_02105;HAP96_02370;HAP99_07050;HF288_04635;QER43240.1;AUW31902.1;OFC56728.1;AEK57126.1;HAQ02_03635;OFC30189.1;OFC35612.1;HFU97_03650;HFU84_02870;HFU87_03675;HFQ13_08915;HFU75_00240;HFV00_06580;RNF58760.1;ACK80451.1;PZD80768.1;ACH84571.1;WP_163054286.1;HF282_12435;HMI48_07610;…	.
55	iscA	iron-sulfur cluster assembly protein	Brite Hierarchies; Protein families: genetic information processing; Transfer RNA biogenesis	K13628	40	1	1	1	1	1	1	1	1	1	1	1	1	1	1	EGQ61828.1;HF281_11015;AIA54689.1;HAP97_15015;HFV02_12375;HAQ03_10445;HAQ00_04600;OFC29729.1;HAP98_13375;HAP96_14295;HAP99_05295;HF288_09110;QER43471.1;AUW32190.1;OFC61138.1;AEK57478.1;HAQ02_05860;OFC36792.1;OFC37709.1;HFU97_06615;HFU84_00290;HFU87_02110;HFQ13_09820;HFU75_03655;HFV00_12825;RNF60570.1;ACK78248.1;PZD82253.1;ACH83074.1;WP_009566456.1;HF282_04805;fig|6666666.521345.peg.2854;HMI48_160…	.
105	miaB	tRNA-2-methylthio-N6-dimethylallyladenosine synthase [EC:2.8.4.3]	Brite Hierarchies; Protein families: genetic information processing; Transfer RNA biogenesis	K06168	85	1	1	1	1	1	1	1	1	1	1	1	1	1	1	OYV73604.1;OYV79393.1;HGE68398.1;HF281_05790;AIA54433.1;HAP97_05420;HFV02_01430;HAQ03_05440;HAQ00_06705;OFC34870.1;HAP98_10010;HAP96_01490;HAP99_07645;HF288_08950;QER43293.1;AUW31948.1;OFC56569.1;AEK57182.1;HAQ02_13445;OFC39930.1;OFC38145.1;HFU97_14230;HFU84_02115;HFU87_02760;HFQ13_06360;HFU75_00445;HFV00_08500;RNF60325.1;ACK78618.1;PZD82325.1;ACH82998.1;WP_163057425.1;HF282_11990;HMI48_16485;WP_…	.
104	trmB	tRNA (guanine-N7-)-methyltransferase [EC:2.1.1.33]	Brite Hierarchies; Protein families: genetic information processing; Transfer RNA biogenesis	K03439	78	1	1	1	1	1	1	1	1	1	1	1	1	1	1	HF283_01090;HF283_03115;HF283_17300;HF283_05935;OYV72457.1;HF281_09800;AIA56287.1;HAP97_14260;HFV02_03295;HAQ03_03880;HAQ00_06185;OFC27823.1;HAP98_11185;HAP96_03075;HAP99_06445;HF288_02770;QER43879.1;AUW33629.1;OFC51379.1;AEK59244.1;HAQ02_10835;OFC37672.1;OFC40921.1;HFU97_14505;HFU84_07470;HFU87_11990;HFQ13_00900;HFU75_13585;HFV00_03255;RNF59251.1;ACK78559.1;PZD82951.1;ACH82702.1;WP_163058762.1;H…	.
76	bamE	outer membrane protein assembly factor BamE	Brite Hierarchies; Protein families: signaling and cellular processes; Transporters	K06186	73	1	1	1	1	1	1	1	1	1	1	1	1	1	1	HF281_09755;AIA56278.1;HAP97_14305;HFV02_03250;HAQ03_03925;HAQ00_06140;OFC39224.1;HAP98_04685;HAP96_03120;HAP99_04600;HF288_02725;QER43870.1;AUW33619.1;OFC61744.1;AEK59235.1;HAQ02_04925;OFC30249.1;OFC40886.1;HFU97_14455;HFU84_07520;HFU87_12040;HFQ13_00850;HFU75_13535;HFV00_03205;RNF63324.1;ACK79629.1;PZD82703.1;ACH82711.1;WP_163058616.1;HF282_18310;HMI48_17970;EGQ63142.1;WP_009567211.1;HF290_0916…	.
25	corC	magnesium and cobalt transporter	Brite Hierarchies; Protein families: signaling and cellular processes; Transporters	K06189	22	1	1	1	1	1	1	1	1	1	1	1	1	1	1	WP_035209854.1;HAP93_08805;OYV76871.1;HF281_05805;AIA54436.1;HAP97_05435;HFV02_01415;HAQ03_05455;HAQ00_06690;OFC34873.1;HAP98_10025;HAP96_01475;HAP99_07630;HF288_08965;QER43296.1;AUW31951.1;OFC48763.1;AEK57185.1;HAQ02_13460;OFC39927.1;OFC38148.1;HFU97_14245;HFU84_02100;HFU87_02745;HFQ13_06345;HFU75_00430;HFV00_08515;RNF60291.1;ACK78784.1;PZD82323.1;ACH83001.1;WP_163057423.1;HF282_15965;fig|666666…	.
32	emrB	MFS transporter, DHA2 family, multidrug resistance protein	Brite Hierarchies; Protein families: signaling and cellular processes; Transporters	K03446	-	2	2	1	1	2	2	2	2	1	1	1	1	2	2	EGQ63975.1;HF290_03895;HF563_08080;HAP95_12980;HAP94_00065;HF929_10635;HF283_01180;WP_010637421.1;HF283_02795;HF283_07125;HF283_06065;HF283_09410;HF283_15025;HER14_11385;HF283_15285;HF283_15925;HF283_16035;HF283_17345;HAQ03_01535;HAQ02_01655;EGQ62183.1;HAQ03_03425;HAQ02_12465;EGQ62375.1;HF673_18230;HF292_04505;HF563_05470;HF563_06975;HF639_04280;TQN52556.1;HF671_13205;OCX71487.1;OCX83647.1;HJG40_…	.
24	exbD	biopolymer transport protein ExbD	Brite Hierarchies; Protein families: signaling and cellular processes; Transporters	K03559	58	1	1	1	1	1	1	1	1	1	1	1	1	1	1	EGQ64101.1;HF283_00320;HF283_13250;HF283_13565;HF563_08720;HER14_03120;HAQ01_16375;HF670_06165;HF673_19385;NDU44073.1;WP_010642346.1;WP_031569442.1;HJG40_13290;TQN49512.1;WP_010639138.1;HF669_09910;TQN52510.1;HF671_09130;OCX78125.1;HAP95_06460;HAP95_13290;PKY09865.1;OFA16358.1;HF281_02890;HF281_04665;AIA54588.1;AIA54987.1;HAP97_10240;HAP97_12150;HFV02_11820;HFV02_14625;HAQ03_01690;HAQ03_06805;HAQ…	.
58	lptC	lipopolysaccharide export system protein LptC	Brite Hierarchies; Protein families: signaling and cellular processes; Transporters	K11719	20	1	1	1	1	1	1	1	1	1	1	1	1	1	1	HF668_06340;HF281_01090;AIA54286.1;HAP97_03695;HFV02_07425;HAQ03_06885;HAQ00_02710;OFC35181.1;HAP98_10540;HAP96_09930;HAP99_01165;HF288_05240;QER44458.1;AUW31810.1;OFC61784.1;AEK57020.1;HAQ02_07035;OFC38515.1;OFC41707.1;HFU97_01820;HFU84_14155;HFU87_04520;HFQ13_01340;HFU75_10550;HFV00_05305;RNF60317.1;ACK79413.1;PZD81002.1;ACH84830.1;WP_163057325.1;HF282_00920;fig|6666666.521345.peg.2644;HMI48_08…	.
56	mscL	large conductance mechanosensitive channel	Brite Hierarchies; Protein families: signaling and cellular processes; Transporters	K03282	60	1	1	1	1	1	1	1	1	1	1	1	1	1	1	HF281_10130;AIA53952.1;HAP97_10685;HFV02_11625;HAQ03_12280;HAQ00_13430;OFC28938.1;HAP98_10470;HAP96_04080;HAP99_07980;HF288_04790;QER45686.1;AUW31628.1;OFC43026.1;AEK56716.1;HAQ02_12625;OFC38019.1;OFC37200.1;HFU97_03425;HFU84_02645;HFU87_03900;HFQ13_02440;HFU75_06005;HFV00_06355;RNF59206.1;ACK78500.1;PZD80319.1;ACH85045.1;WP_163056342.1;HF282_13875;HMI48_11865;EGQ62695.1;WP_009566636.1;HF290_0082…	.
15	rbbA	ABC-2 type transport system ATP-binding protein	Brite Hierarchies; Protein families: signaling and cellular processes; Transporters	K01990	12	2	1	1	1	1	1	1	1	2	1	1	1	1	1	HF290_10030;HF289_11135;HF283_00150;HF283_09960;HF283_19975;HF563_01350;TQN50684.1;TQN52523.1;QFX95727.1;WP_157999030.1;OCX74272.1;HER14_12130;HF669_09975;HAQ01_08515;HF670_06260;OCX75045.1;OCX82679.1;OCX89803.1;HF671_13325;OFC48447.1;WP_075322704.1;HAP67_04800;HF673_00680;WP_010639124.1;OCX72358.1;OCX81491.1;HAP95_00785;HHS34_14395;PKY09855.1;HF281_09510;HF281_10615;AIA55892.1;HAP97_05995;HFV02_…	.
20	uup	ABC transport system ATP-binding/permease protein	Brite Hierarchies; Protein families: signaling and cellular processes; Transporters	K15738	87	1	1	1	1	1	1	1	1	1	1	1	1	1	1	HF281_04610;AIA54577.1;HAP97_11905;HFV02_00925;HAQ03_01635;HAQ00_08780;OFC36141.1;HAP98_04810;HAP96_11590;HAP99_07390;HF288_05000;QER44290.1;AUW32067.1;OFC60913.1;AEK57316.1;HAQ02_03265;OFC37611.1;OFC39355.1;HFU97_02685;HFU84_01060;HFU87_01190;HFQ13_11565;HFU75_02995;HFV00_04310;RNF67692.1;ACK79038.1;PZD80892.1;ACH84706.1;WP_163054428.1;HF282_19290;HMI48_08305;WP_012537458.1;HF290_11835;HF283_010…	.
81	ahpC	peroxiredoxin (alkyl hydroperoxide reductase subunit C) [EC:1.11.1.15]	Cellular Processes; Cell growth and death; Apoptosis - fly | Brite Hierarchies; Protein families: signaling and cellular processes; Exosome	K03386	59	1	1	1	1	1	1	1	1	1	1	1	1	1	1	EGQ63921.1;HF283_12180;HF285_12935;OCB02904.1;WP_081662556.1;HF281_12550;AIA54777.1;HAP97_00065;HFV02_09550;HAQ03_08820;HAQ00_08115;OFC32345.1;HAP98_09825;HAP96_04320;HAP99_03150;HF288_03645;QER43696.1;AUW32268.1;OFC43758.1;AEK57570.1;HAQ02_07265;OFC36458.1;OFC41170.1;HFU97_06030;HFU84_10050;HFU87_05390;HFQ13_12280;HFU75_02240;HFV00_04740;RNF68317.1;ACK79980.1;PZD81882.1;ACH83341.1;WP_012536483.1…	.
88	pgaB	poly-beta-1,6-N-acetyl-D-glucosamine N-deacetylase [EC:3.5.1.-]	Cellular Processes; Cellular community - prokaryotes; Biofilm formation - Escherichia coli	K11931	30	1	1	1	1	1	1	1	1	1	1	0	1	1	1	HFU97_10490;HFU84_10335;HFU87_12630;HFQ13_05830;HFU75_13840;HFV00_07480;TQN49899.1;QFX94849.1;WP_080570788.1;WP_077273074.1;OCX72255.1;HER14_02325;HF669_04585;HAQ01_10955;HF670_00905;OCX69992.1;OCX82513.1;OCX87663.1;HF671_08505;OFC50059.1;WP_077218167.1;HAP67_11025;HF673_13660;OCX75238.1;OCX87305.1;HAP95_06745;HGE68584.1;fig|6666666.523682.peg.862;RNF57764.1;	.
16	ftsX	cell division transport system permease protein	Environmental Information Processing; Membrane transport; ABC transporters | Brite Hierarchies; Protein families: genetic information processing; Chromosome and associated proteins | Brite Hierarchies; Protein families: signaling and cellular processes; Transporters	K09811	8	1	1	1	1	1	1	1	1	1	1	1	1	1	1	OYV81679.1;HF281_04875;AIA54388.1;HAP97_04810;HFV02_13265;HAQ03_12600;HAQ00_03160;OFC29672.1;HAP98_02110;HAP96_02375;HAP99_07045;HF288_04630;QER43241.1;AUW31901.1;OFC56727.1;AEK57125.1;HAQ02_03630;OFC30188.1;OFC35611.1;HFU97_03655;HFU84_02875;HFU87_03670;HFQ13_08910;HFU75_00235;HFV00_06585;RNF58759.1;ACK77971.1;PZD80769.1;ACH84572.1;WP_009568267.1;HF282_12430;fig|6666666.521345.peg.3248;HMI48_076…	.
57	lptB	lipopolysaccharide export system ATP-binding protein [EC:3.6.3.-]	Environmental Information Processing; Membrane transport; ABC transporters | Brite Hierarchies; Protein families: signaling and cellular processes; Transporters	K06861	19	1	1	1	1	1	1	1	1	1	1	1	1	1	1	OYV71943.1;HF281_01080;AIA54288.1;HAP97_03685;HFV02_07435;HAQ03_06895;HAQ00_02720;OFC35183.1;HAP98_10530;HAP96_09940;HAP99_01175;HF288_05230;QER44456.1;AUW31812.1;OFC61786.1;AEK57022.1;HAQ02_10115;OFC38517.1;OFC41709.1;HFU97_01810;HFU84_14145;HFU87_04510;HFQ13_01330;HFU75_10540;HFV00_05315;RNF60319.1;ACK78445.1;PZD81000.1;ACH84828.1;WP_163057329.1;HF282_00910;fig|6666666.521345.peg.2646;HMI48_089…	.
21	mlaF	phospholipid/cholesterol/gamma-HCH transport system ATP-binding protein	Environmental Information Processing; Membrane transport; ABC transporters | Brite Hierarchies; Protein families: signaling and cellular processes; Transporters	K02065	44	1	1	1	1	1	1	1	1	1	1	1	1	1	1	EGQ64126.1;HF283_19975;HF285_05170;HF563_05025;OYV72319.1;HF281_09250;AIA55946.1;HAP97_04310;HFV02_05455;HAQ03_13285;HAQ00_15430;OFC29846.1;HAP98_09585;HAP96_00085;HAP99_11485;HF288_09555;QER44235.1;AUW33310.1;OFC59625.1;AEK58898.1;HAQ02_00815;OFC35133.1;OFC39303.1;HFU97_09605;HFU84_05765;HFU87_06435;HFQ13_03575;HFU75_11240;HFV00_10080;RNF60918.1;ACK78897.1;PZD82278.1;ACH83047.1;WP_012536261.1;HF…	.
47	envZ	two-component system, OmpR family, osmolarity sensor histidine kinase EnvZ [EC:2.7.13.3]	Environmental Information Processing; Signal transduction; Two-component system | Cellular Processes; Cellular community - prokaryotes; Biofilm formation - Escherichia coli | Brite Hierarchies; Protein families: metabolism; Protein kinases | Brite Hierarchies; Protein families: signaling and cellular processes; Two-component system	K07638	82	1	1	1	1	1	1	1	1	1	1	1	1	1	1	HF283_02435;HF563_03200;HF563_07875;HAQ03_12955;HJG40_02985;HJG40_14675;OYV72352.1;OYV79219.1;HF281_00530;HF281_10165;AIA53945.1;AIA55220.1;HAP97_08270;HAP97_15250;HFV02_11590;HAQ03_12315;HAQ00_06855;HAQ00_13395;OFC28945.1;HAP98_07635;HAP98_14355;HAP96_04045;HAP96_06775;HAP99_07945;HF288_02585;HF288_04825;QER44103.1;QER45679.1;AUW31621.1;AUW34007.1;OFC45446.1;OFC61208.1;AEK56709.1;AEK58242.1;HAQ0…	.
90	secB	preprotein translocase subunit SecB	Genetic Information Processing; Folding, sorting and degradation; Protein export | Environmental Information Processing; Membrane transport; Bacterial secretion system | Cellular Processes; Cellular community - prokaryotes; Quorum sensing | Brite Hierarchies; Protein families: genetic information processing; Chaperones and folding catalysts | Brite Hierarchies; Protein families: signaling and cel…	K03071	83	1	1	1	1	1	1	1	1	1	1	1	1	1	1	HAP94_02090;HF281_06885;AIA54645.1;HAP97_12445;HFV02_03725;HAQ03_01985;HAQ00_09130;OFC34924.1;HAP98_09150;HAP96_03420;HAP99_02065;HF288_05435;QER43307.1;AUW32131.1;OFC48490.1;AEK57386.1;HAQ02_02145;OFC30591.1;OFC38637.1;HFU97_04880;HFU84_06380;HFU87_09240;HFQ13_12505;HFU75_02465;HFV00_05875;RNF68395.1;ACK78961.1;PZD79868.1;ACH84007.1;WP_012536993.1;HF282_06520;fig|6666666.521345.peg.3644;HMI48_03…	.
41	fpg	formamidopyrimidine-DNA glycosylase [EC:3.2.2.23 4.2.99.18]	Genetic Information Processing; Replication and repair; Base excision repair | Brite Hierarchies; Protein families: genetic information processing; DNA repair and recombination proteins	K10563	33	1	1	1	1	1	1	1	1	1	1	1	1	1	1	HF283_10065;HF283_17780;OYV73505.1;OYV74074.1;HF281_04910;AIA54381.1;HAP97_04775;HFV02_13300;HAQ03_12635;HAQ00_03195;OFC29665.1;HAP98_02145;HAP96_02410;HAP99_07010;HF288_04595;QER43248.1;AUW31894.1;OFC61254.1;AEK57118.1;HAQ02_03595;OFC30181.1;OFC35604.1;HFU97_03690;HFU84_02910;HFU87_03635;HFQ13_08875;HFU75_00200;HFV00_06620;RNF58753.1;ACK78008.1;PZD80776.1;ACH84579.1;WP_163054298.1;HF282_15840;HM…	.
31	holC	DNA polymerase III subunit chi [EC:2.7.7.7]	Genetic Information Processing; Replication and repair; DNA replication | Genetic Information Processing; Replication and repair; Mismatch repair | Genetic Information Processing; Replication and repair; Homologous recombination | Brite Hierarchies; Protein families: genetic information processing; DNA replication proteins | Brite Hierarchies; Protein families: genetic information processing; DNA…	K02339	10	1	1	1	1	1	1	1	1	1	1	1	1	1	1	OYV78558.1;HF281_06950;AIA54631.1;HAP97_12380;HFV02_03790;HAQ03_01920;HAQ00_09065;OFC37769.1;HAP98_07045;HAP96_03355;HAP99_02000;HF288_01345;QER44351.1;AUW32118.1;OFC63363.1;AEK57372.1;HAQ02_13235;OFC35377.1;OFC37655.1;HFU97_03185;HFU84_01560;HFU87_01690;HFQ13_12570;HFU75_02530;HFV00_02310;RNF66370.1;ACK78081.1;PZD79802.1;ACH84079.1;WP_163056137.1;HF282_05840;fig|6666666.521345.peg.4458;HMI48_035…	.
28	ruvC	crossover junction endodeoxyribonuclease RuvC [EC:3.1.22.4]	Genetic Information Processing; Replication and repair; Homologous recombination | Brite Hierarchies; Protein families: genetic information processing; DNA repair and recombination proteins	K01159	6	1	1	1	1	1	1	1	1	1	1	1	1	1	1	OYV73586.1;HF281_08825;AIA56484.1;HAP97_05715;HFV02_09470;HAQ03_04805;HAQ00_07315;OFC35710.1;HAP98_08460;HAP96_13415;HAP99_04500;HF288_07375;QER45119.1;AUW33807.1;OFC54737.1;AEK59441.1;HAQ02_07080;OFC40084.1;OFC40816.1;HFU97_11945;HFU84_09360;HFU87_10820;HFQ13_14330;HFU75_09855;HFV00_02435;RNF67310.1;ACK79514.1;PZD80498.1;ACH82323.1;WP_163055746.1;HF282_02230;fig|6666666.521345.peg.4108;HMI48_124…	.
36	xseB	exodeoxyribonuclease VII small subunit [EC:3.1.11.6]	Genetic Information Processing; Replication and repair; Mismatch repair | Brite Hierarchies; Protein families: genetic information processing; DNA repair and recombination proteins	K03602	64	1	1	1	1	1	1	1	1	1	1	1	1	1	1	HF281_10375;AIA55842.1;HAP97_14050;HFV02_07730;HAQ03_09055;HAQ00_12830;OFC32941.1;HAP98_14025;HAP96_08280;HAP99_07790;HF288_08675;QER45077.1;AUW33219.1;OFC62258.1;AEK58806.1;HAQ02_09680;OFC39563.1;OFC39421.1;HFU97_03990;HFU84_08065;HFU87_03935;HFQ13_12940;HFU75_05270;HFV00_10290;RNF58255.1;ACK79424.1;PZD79995.1;ACH83866.1;WP_009567229.1;HF282_13785;HMI48_02510;EGQ63157.1;HF290_03245;HF283_03080;R…	.
17	alaS	alanyl-tRNA synthetase [EC:6.1.1.7]	Genetic Information Processing; Translation; Aminoacyl-tRNA biosynthesis | Brite Hierarchies; Protein families: metabolism; Amino acid related enzymes | Brite Hierarchies; Protein families: genetic information processing; Transfer RNA biogenesis	K01872	50	1	1	1	1	1	1	1	1	1	1	1	1	1	1	HF925_05545;HF281_01545;AIA55300.1;HAP97_06895;HFV02_12840;HAQ03_00475;HAQ00_10775;OFC29579.1;HAP98_14895;HAP96_01130;HAP99_05420;HF288_00340;QER45790.1;AUW32936.1;OFC61573.1;AEK58331.1;HAQ02_02400;OFC39541.1;OFC39789.1;HFU97_09715;HFU84_05655;HFU87_06325;HFQ13_03465;HFU75_11130;HFV00_10190;RNF68122.1;ACK80463.1;PZD81925.1;ACH83294.1;WP_163055996.1;HF282_00535;fig|6666666.521345.peg.2993;HMI48_14…	.
83	pheS	phenylalanyl-tRNA synthetase alpha chain [EC:6.1.1.20]	Genetic Information Processing; Translation; Aminoacyl-tRNA biosynthesis | Brite Hierarchies; Protein families: metabolism; Amino acid related enzymes | Brite Hierarchies; Protein families: genetic information processing; Transfer RNA biogenesis	K01889	55	1	1	1	1	1	1	1	1	1	1	1	1	1	1	HF561_14375;PKY11348.1;HF281_03775;AIA56247.1;HAP97_06475;HFV02_14905;HAQ03_04080;HAQ00_05985;OFC39252.1;HAP98_08950;HAP96_08555;HAP99_00320;HF288_01275;QER43837.1;AUW33590.1;OFC61085.1;AEK59204.1;HAQ02_05080;OFC40276.1;OFC40962.1;HFU97_00300;HFU84_03165;HFU87_04995;HFQ13_10355;HFU75_08105;HFV00_03780;RNF58795.1;ACK78127.1;PZD80650.1;ACH84442.1;WP_163058216.1;HF282_10215;HMI48_06955;WP_012537290.…	.
19	aspS	aspartyl-tRNA synthetase [EC:6.1.1.12]	Genetic Information Processing; Translation; Aminoacyl-tRNA biosynthesis | Brite Hierarchies; Protein families: metabolism; Amino acid related enzymes | Brite Hierarchies; Protein families: genetic information processing; Transfer RNA biogenesis | Brite Hierarchies; Protein families: genetic information processing; Mitochondrial biogenesis	K01876	53	1	1	1	1	1	1	1	1	1	1	1	1	1	1	HF283_00490;OYV80886.1;HF283_15880;OYV82591.1;HF563_07160;HF281_08850;AIA56479.1;HAP97_10910;HFV02_15130;HAQ03_04780;HAQ00_07290;OFC35705.1;HAP98_06170;HAP96_00730;HAP99_04525;HF288_04720;QER45114.1;AUW33803.1;OFC54732.1;AEK59436.1;HAQ02_07055;OFC40089.1;OFC40821.1;HFU97_11970;HFU84_09335;HFU87_10845;HFQ13_14305;HFU75_09880;HFV00_02460;RNF67315.1;ACK79763.1;PZD80411.1;ACH82319.1;WP_163055446.1;HF…	.
9	rplA	large subunit ribosomal protein L1	Genetic Information Processing; Translation; Ribosome | Brite Hierarchies; Protein families: genetic information processing; Ribosome	K02863	35	1	1	1	1	1	1	1	1	1	1	1	1	1	1	HF290_12790;HF285_12535;HF292_08305;HF561_12435;HF563_18355;HF568_04605;HF639_04620;HF281_04040;AIA54488.1;HAP97_05215;HFV02_10455;HAQ03_03020;HAQ00_11215;OFC38754.1;HAP98_12570;HAP96_07170;HAP99_08680;HF288_11880;QER44614.1;AUW31998.1;OFC61297.1;AEK57244.1;HAQ02_12975;OFC30460.1;OFC41927.1;HFU97_12325;HFU84_08395;HFU87_05820;HFQ13_05625;HFU75_01090;HFV00_10880;RNF68377.1;ACK78035.1;PZD82673.1;AC…	.
12	rplT	large subunit ribosomal protein L20	Genetic Information Processing; Translation; Ribosome | Brite Hierarchies; Protein families: genetic information processing; Ribosome	K02887	54	1	1	1	1	1	1	1	1	1	1	1	1	1	1	HF281_03770;AIA56246.1;HAP97_06480;HFV02_14910;HAQ03_04085;HAQ00_05980;OFC39253.1;HAP98_08945;HAP96_08560;HAP99_00325;HF288_01280;QER43836.1;AUW33589.1;OFC61086.1;AEK59203.1;HAQ02_09250;OFC40277.1;OFC40961.1;HFU97_00295;HFU84_03170;HFU87_05000;HFQ13_10350;HFU75_08110;HFV00_03775;RNF58794.1;ACK80680.1;PZD80651.1;ACH84443.1;WP_012537291.1;HF282_10220;fig|6666666.521345.peg.3955;HMI48_06960;HF290_16…	.
13	rpmB	large subunit ribosomal protein L28	Genetic Information Processing; Translation; Ribosome | Brite Hierarchies; Protein families: genetic information processing; Ribosome	K02902	42	1	1	1	1	1	1	1	1	1	1	1	1	1	1	HF921_00070;HF281_03275;AIA56199.1;HAP97_07390;HFV02_14180;HAQ03_04325;HAQ00_05745;OFC34831.1;HAP98_06005;HAP96_04215;HAP99_09640;HF288_00030;QER43943.1;AUW33543.1;OFC61106.1;AEK59156.1;HAQ02_11055;OFC30613.1;OFC38547.1;HFU97_02235;HFU84_09630;HFU87_14440;HFQ13_04725;HFU75_04045;HFV00_13535;RNF60761.1;ACK80255.1;PZD80700.1;ACH84496.1;WP_009567983.1;HF282_02685;fig|6666666.521345.peg.4694;HMI48_07…	.
14	rpmI	large subunit ribosomal protein L35	Genetic Information Processing; Translation; Ribosome | Brite Hierarchies; Protein families: genetic information processing; Ribosome	K02916	3	1	1	1	1	1	1	1	1	1	1	1	1	1	1	HF281_03765;AIA56245.1;HAP97_06485;HFV02_14915;HAQ03_04090;HAQ00_05975;OFC39254.1;HAP98_08940;HAP96_08565;HAP99_00330;HF288_01285;QER43835.1;AUW33588.1;OFC61063.1;AEK59202.1;HAQ02_09255;OFC40278.1;OFC40960.1;HFU97_00290;HFU84_03175;HFU87_05005;HFQ13_10345;HFU75_08115;HFV00_03770;RNF58793.1;ACK79945.1;PZD80652.1;ACH84444.1;WP_012537292.1;HF282_10225;fig|6666666.521345.peg.3954;HMI48_06965;EGQ62677…	.
6	rpsB	small subunit ribosomal protein S2	Genetic Information Processing; Translation; Ribosome | Brite Hierarchies; Protein families: genetic information processing; Ribosome	K02967	21	1	1	1	1	1	1	1	1	1	1	1	1	1	1	HF283_12790;OYV73846.1;HF281_11075;AIA54701.1;HAP97_14955;HFV02_12435;HAQ03_10385;HAQ00_04660;OFC29718.1;HAP98_03500;HAP96_14355;HAP99_05770;HF288_09170;QER43459.1;AUW32200.1;OFC62329.1;AEK57490.1;HAQ02_05920;OFC39501.1;OFC37683.1;HFU97_06675;HFU84_00350;HFU87_02170;HFQ13_09880;HFU75_03715;HFV00_12765;RNF59614.1;ACK79803.1;PZD81725.1;ACH83398.1;WP_009564727.1;HF282_12520;fig|6666666.521345.peg.43…	.
7	rpsI	small subunit ribosomal protein S9	Genetic Information Processing; Translation; Ribosome | Brite Hierarchies; Protein families: genetic information processing; Ribosome	K02996	45	1	1	1	1	1	1	1	1	1	1	1	1	1	1	HF281_05030;AIA54357.1;HAP97_02540;HFV02_06730;HAQ03_02040;HAQ00_03315;OFC38861.1;HAP98_12780;HAP96_03620;HAP99_11510;HF288_03805;QER43275.1;AUW31875.1;OFC61577.1;AEK57094.1;HAQ02_04640;OFC39048.1;OFC38250.1;HFU97_10695;HFU84_04045;HFU87_12170;HFQ13_04945;HFU75_12590;HFV00_04065;RNF59314.1;ACK79619.1;PZD81044.1;ACH84874.1;WP_009567384.1;HF282_18860;fig|6666666.521345.peg.900;HMI48_09150;EGQ63298.…	.
5	rpsO	small subunit ribosomal protein S15	Genetic Information Processing; Translation; Ribosome | Brite Hierarchies; Protein families: genetic information processing; Ribosome	K02956	16	1	1	1	1	1	1	1	1	1	1	1	1	1	1	HF281_02665;AIA56153.1;HAP97_13240;HFV02_08945;HAQ03_08760;HAQ00_07215;OFC29773.1;HAP98_07900;HAP96_10900;HAP99_04795;HF288_10065;QER44393.1;AUW33501.1;OFC57150.1;AEK59109.1;HAQ02_09935;OFC36667.1;OFC35309.1;HFU97_03935;HFU84_06565;HFU87_09410;HFQ13_00110;HFU75_04915;HFV00_11040;RNF62851.1;ACK80917.1;PZD82604.1;ACH82812.1;WP_009567341.1;HF282_04280;fig|6666666.521345.peg.3154;HMI48_17410;EGQ63257…	.
46	mtnX	2-hydroxy-3-keto-5-methylthiopentenyl-1-phosphate phosphatase [EC:3.1.3.87]	Metabolism; Amino acid metabolism; Cysteine and methionine metabolism	K08966	49	1	1	1	1	1	1	1	1	1	1	1	1	1	1	OCX87266.1;HF281_00555;AIA56121.1;HAP97_04655;HFV02_09445;HAQ03_08600;HAQ00_07055;OFC29632.1;HAP98_11925;HAP96_11650;HAP99_12470;HF288_11550;QER44361.1;AUW33470.1;OFC61835.1;AEK59077.1;HAQ02_06090;OFC30139.1;OFC37787.1;HFU97_01695;HFU84_14030;HFU87_04395;HFQ13_01215;HFU75_10425;HFV00_05430;RNF76447.1;ACK78197.1;PZD82946.1;ACH82851.1;WP_163056616.1;HF282_14015;fig|6666666.521345.peg.5282;HMI48_172…	.
3	aroA	3-deoxy-7-phosphoheptulonate synthase [EC:2.5.1.54]	Metabolism; Amino acid metabolism; Phenylalanine, tyrosine and tryptophan biosynthesis	K03856	11	1	1	1	1	1	1	1	1	1	1	1	1	1	1	QFG78183.1;HF561_00545;HF568_01355;HF639_13280;BBF65988.1;OAP92646.1;OYV72166.1;HF281_03075;AIA55026.1;HAP97_07220;HFV02_08525;HAQ03_06990;HAQ00_00130;OFC36212.1;HAP98_05765;HAP96_04520;HAP99_07120;HF288_11350;QER45430.1;AUW32697.1;OFC61931.1;AEK58039.1;HAQ02_02895;OFC35581.1;OFC42352.1;HFU97_08215;HFU84_11710;HFU87_06235;HFQ13_02020;HFU75_06900;HFV00_11585;RNF59401.1;ACK80370.1;PZD81953.1;ACH832…	.
86	mupP	N-acetyl-D-muramate 6-phosphate phosphatase [EC:3.1.3.105]	Metabolism; Carbohydrate metabolism; Amino sugar and nucleotide sugar metabolism	K22292	36	1	1	1	1	1	1	1	1	1	1	1	1	1	1	HGE68952.1;HF281_03525;HAP97_13540;HFV02_05020;HAQ03_06725;HAQ00_02175;OFC32723.1;HAP98_07095;HAP96_13765;HAP99_06760;HF288_00950;AUW32651.1;HAQ02_14060;OFC40326.1;OFC37362.1;HFU97_07850;HFU84_00855;HFU87_02675;HFQ13_14055;HFU75_01355;HFV00_12260;RNF61699.1;ACK78918.1;PZD81566.1;ACH83728.1;WP_163055160.1;HF282_06450;HMI48_01315;EGQ61772.1;WP_009564442.1;HF290_09290;HF283_17525;RRN83001.1;HF289_10…	.
44	gcvH	glycine cleavage system H protein	Metabolism; Carbohydrate metabolism; Glyoxylate and dicarboxylate metabolism | Metabolism; Amino acid metabolism; Glycine, serine and threonine metabolism	K02437	25	1	1	1	1	1	1	1	1	1	1	1	1	1	1	HF283_05425;HF283_07185;HF283_15555;HF281_07910;AIA56043.1;HAP97_09630;HFV02_05970;HAQ03_05945;HAQ00_10480;OFC38064.1;HAP98_01175;HAP96_12520;HAP99_03775;HF288_10240;QER44135.1;AUW33394.1;OFC60898.1;AEK58994.1;HAQ02_12105;OFC29840.1;OFC42163.1;HFU97_13425;HFU84_04290;HFU87_08915;HFQ13_11200;HFU75_01450;HFV00_05840;RNF68340.1;ACK78498.1;PZD80593.1;ACH84381.1;WP_009565261.1;HF282_15690;fig|6666666.…	.
87	prkB	phosphoribulokinase [EC:2.7.1.19]	Metabolism; Energy metabolism; Carbon fixation in photosynthetic organisms	K00855	79	1	1	1	1	1	1	1	1	1	1	1	1	1	1	HF283_01720;OYV73032.1;OYV77992.1;HF281_01255;AIA54253.1;HAP97_08960;HFV02_13775;HAQ03_14130;HAQ00_02545;OFC35005.1;HAP98_01560;HAP96_13610;HAP99_01595;HF288_07445;QER44491.1;AUW31779.1;OFC61491.1;AEK56987.1;HAQ02_03815;OFC39709.1;OFC40491.1;HFU97_04335;HFU84_08920;HFU87_10570;HFQ13_07255;HFU75_07445;HFV00_14245;RNF58686.1;ACK78673.1;PZD82941.1;ACH82944.1;WP_163057960.1;HF282_09030;fig|6666666.52…	.
62	nuoA	NADH-quinone oxidoreductase subunit A [EC:7.1.1.2]	Metabolism; Energy metabolism; Oxidative phosphorylation	K00330	24	1	1	1	1	1	1	1	1	1	1	1	1	1	1	HF283_02505;HF669_15420;HF281_09660;AIA56259.1;HAP97_04895;HFV02_03150;HAQ03_04020;HAQ00_06045;OFC39241.1;HAP98_14465;HAP96_09005;HAP99_04695;HF288_02630;QER43850.1;AUW33601.1;OFC61387.1;AEK59215.1;HAQ02_05020;OFC30266.1;OFC40973.1;NDU43540.1;TQN49741.1;QFX94684.1;WP_010640739.1;WP_024894637.1;OCX70365.1;HER14_18420;HF669_02065;HAQ01_09600;HF670_01695;OCX78645.1;OCX84042.1;OCX88858.1;HF671_07585;…	.
63	nuoC	NADH-quinone oxidoreductase subunit C [EC:7.1.1.2]	Metabolism; Energy metabolism; Oxidative phosphorylation	K00332	75	1	1	1	1	1	1	1	1	1	1	1	1	1	1	HF283_02515;HF283_20635;HGE68009.1;HF281_03685;AIA56230.1;HAP97_06565;HFV02_09995;HAQ03_04170;HAQ00_05895;OFC39269.1;HAP98_08860;HAP96_08645;HAP99_00410;HF288_09950;QER43820.1;AUW33573.1;OFC54345.1;AEK59187.1;HAQ02_06255;OFC40293.1;OFC41038.1;HFU97_00210;HFU84_03255;HFU87_05085;HFQ13_10265;HFU75_08195;HFV00_03690;RNF58779.1;ACK79369.1;PZD80666.1;ACH84458.1;WP_163058234.1;HF282_11005;fig|6666666.5…	.
64	nuoD	NADH-quinone oxidoreductase subunit D [EC:7.1.1.2]	Metabolism; Energy metabolism; Oxidative phosphorylation	K00333	-	1	1	1	1	1	1	1	1	1	1	1	1	1	1	HF283_13555;HF283_19180;HF292_04900;HF563_10660;HF568_10780;HF668_15050;HF568_00225;OYV81468.1;AIA55502.1;HAP97_09085;HAQ03_02135;HAQ00_10370;OFC30120.1;HAP98_08175;HAP96_13710;HAQ02_04545;OFC30547.1;OFC36165.1;HFU97_01540;HFU97_10230;HFU84_10210;HFU84_10595;HFU87_00665;HFU87_12890;HFQ13_06090;HFU75_14100;HFV00_00825;HFV00_07220;RNF68546.1;WP_064219004.1;WP_081258258.1;HF285_15225;HF292_11120;HF2…	.
66	nuoE	NADH-quinone oxidoreductase subunit E [EC:7.1.1.2]	Metabolism; Energy metabolism; Oxidative phosphorylation	K00334	76	1	1	1	1	1	1	1	1	1	1	1	1	1	1	HF283_06900;HF283_07145;HF283_16580;HF283_20645;HF281_03695;AIA56232.1;HAP97_06555;HFV02_10005;HAQ03_04160;HAQ00_05905;OFC39267.1;HAP98_08870;HAP96_08635;HAP99_00400;HF288_09960;QER43822.1;AUW33575.1;OFC54343.1;AEK59189.1;HAQ02_06265;OFC40291.1;OFC41040.1;HFU97_00220;HFU84_03245;HFU87_05075;HFQ13_10275;HFU75_08185;HFV00_03700;RNF58781.1;ACK78925.1;PZD80664.1;ACH84456.1;WP_163058232.1;HF282_11015;…	.
67	nuoI	NADH-quinone oxidoreductase subunit I [EC:7.1.1.2]	Metabolism; Energy metabolism; Oxidative phosphorylation	K00338	48	1	1	1	1	1	1	1	1	1	1	1	1	1	1	HF281_03715;AIA56236.1;HAP97_06535;HFV02_04135;HAQ03_04140;HAQ00_05925;OFC39263.1;HAP98_08890;HAP96_08615;HAP99_00380;HF288_09980;QER43826.1;AUW33579.1;OFC61054.1;AEK59193.1;HAQ02_09305;OFC40287.1;OFC40979.1;HFU97_00240;HFU84_03225;HFU87_05055;HFQ13_10295;HFU75_08165;HFV00_03720;RNF58785.1;ACK80809.1;PZD80660.1;ACH84452.1;WP_012537299.1;HF282_11970;fig|6666666.521345.peg.3962;HMI48_07010;HF290_17…	.
68	nuoK	NADH-quinone oxidoreductase subunit K [EC:7.1.1.2]	Metabolism; Energy metabolism; Oxidative phosphorylation	K00340	47	1	1	1	1	1	1	1	1	1	1	1	1	1	1	HF281_03725;AIA56238.1;HAP97_06525;HFV02_12990;HAQ03_04130;HAQ00_05935;OFC39261.1;HAP98_08900;HAP96_08605;HAP99_00370;HF288_01325;QER43828.1;AUW33581.1;OFC61052.1;AEK59195.1;HAQ02_09295;OFC40285.1;OFC40953.1;HFU97_00250;HFU84_03215;HFU87_05045;HFQ13_10305;HFU75_08155;HFV00_03730;RNF58787.1;ACK78904.1;PZD80658.1;ACH84450.1;WP_163058268.1;HF282_11960;fig|6666666.521345.peg.3964;HMI48_07000;WP_01260…	.
65	nuoM	NADH-quinone oxidoreductase subunit M [EC:7.1.1.2]	Metabolism; Energy metabolism; Oxidative phosphorylation	K00342	46	1	1	1	1	1	1	1	1	1	1	1	1	1	1	HAP98_04725;HAP98_14410;HF281_03735;AIA56240.1;HAP97_06515;HFV02_14945;HAQ03_04120;HAQ00_05945;OFC39259.1;HAP98_08910;HAP96_08595;HAP99_00360;HF288_01315;QER43830.1;AUW33583.1;OFC61060.1;AEK59197.1;HAQ02_09285;OFC40283.1;OFC40955.1;HFU97_00260;HFU84_03205;HFU87_05035;HFQ13_10315;HFU75_08145;HFV00_03740;RNF58789.1;ACK79846.1;PZD80656.1;ACH84448.1;WP_163058220.1;HF282_11950;fig|6666666.521345.peg.3…	.
53	ppa	inorganic pyrophosphatase [EC:3.6.1.1]	Metabolism; Energy metabolism; Oxidative phosphorylation	K01507	29	1	1	1	1	1	1	1	1	1	1	1	1	1	1	HF281_01295;AIA54244.1;HAP97_13825;HFV02_00195;HAQ03_14090;HAQ00_02505;OFC37357.1;HAP98_11955;HAP96_13570;HAP99_01565;HF288_07405;QER44500.1;AUW31772.1;OFC61505.1;AEK56978.1;HAQ02_03775;OFC39716.1;OFC40196.1;HFU97_04240;HFU84_09015;HFU87_10475;HFQ13_07160;HFU75_07350;HFV00_14340;RNF58707.1;ACK78607.1;PZD82517.1;ACH82905.1;WP_009566885.1;HF282_08055;fig|6666666.521345.peg.1158;HMI48_16940;EGQ62882…	.
38	atpE	F-type H+-transporting ATPase subunit c	Metabolism; Energy metabolism; Oxidative phosphorylation | Metabolism; Energy metabolism; Photosynthesis | Brite Hierarchies; Protein families: metabolism; Photosynthesis proteins	K02110	13	1	1	1	1	1	1	1	1	1	1	1	1	1	1	HF281_00325;AIA53919.1;HAP97_03115;HFV02_06530;HAQ03_07685;HAQ00_13265;OFC28968.1;HAP98_09020;HAP96_12365;HAP99_12370;HF288_05135;QER45238.1;AUW31601.1;OFC60952.1;AEK56679.1;HAQ02_14160;OFC38103.1;OFC37146.1;HFU97_07635;HFU84_04955;HFU87_07660;HFQ13_02570;HFU75_05875;HFV00_07855;RNF65368.1;ACK79563.1;PZD80275.1;ACH84998.1;WP_009561114.1;HF282_03180;fig|6666666.521345.peg.5861;HMI48_00265;EGQ60785…	.
37	atpF	F-type H+-transporting ATPase subunit b	Metabolism; Energy metabolism; Oxidative phosphorylation | Metabolism; Energy metabolism; Photosynthesis | Brite Hierarchies; Protein families: metabolism; Photosynthesis proteins	K02109	61	1	1	1	1	1	1	1	1	1	1	1	1	1	1	HF283_00860;HF283_14535;HF283_16145;HF283_20270;OYV73042.1;HF281_00320;AIA53920.1;HAP97_03110;HFV02_06535;HAQ03_07680;HAQ00_13270;OFC28967.1;HAP98_09015;HAP96_12370;HAP99_12375;HF288_05130;QER45239.1;AUW31602.1;OFC60953.1;AEK56680.1;HAQ02_14155;OFC38104.1;OFC37145.1;HFU97_07640;HFU84_04960;HFU87_07655;HFQ13_02565;HFU75_05880;HFV00_07850;RNF65367.1;ACK80242.1;PZD80274.1;ACH84997.1;WP_163056417.1;H…	.
84	kdsC	3-deoxy-D-manno-octulosonate 8-phosphate phosphatase (KDO 8-P phosphatase) [EC:3.1.3.45]	Metabolism; Glycan biosynthesis and metabolism; Lipopolysaccharide biosynthesis | Brite Hierarchies; Protein families: metabolism; Lipopolysaccharide biosynthesis proteins	K03270	72	1	1	1	1	1	1	1	1	1	1	1	1	1	1	HF283_12525;HF283_13240;HF281_01095;AIA54285.1;HAP97_03700;HFV02_07420;HAQ03_06880;HAQ00_02705;OFC35180.1;HAP98_10545;HAP96_09925;HAP99_01160;HF288_05245;QER44459.1;AUW31809.1;OFC61783.1;AEK57019.1;HAQ02_07030;OFC38514.1;OFC41706.1;HFU97_01825;HFU84_14160;HFU87_04525;HFQ13_01345;HFU75_10555;HFV00_05300;RNF60316.1;ACK80507.1;PZD81156.1;ACH84831.1;WP_163057378.1;HF282_00925;fig|6666666.521345.peg.2…	.
4	fabZ	3-hydroxyacyl-[acyl-carrier-protein] dehydratase [EC:4.2.1.59]	Metabolism; Lipid metabolism; Fatty acid biosynthesis | Metabolism; Metabolism of cofactors and vitamins; Biotin metabolism | Brite Hierarchies; Protein families: metabolism; Lipid biosynthesis proteins	K02372	68	1	1	1	1	1	1	1	1	1	1	1	1	1	1	HF281_11130;AIA54712.1;HAP97_14900;HFV02_04885;HAQ03_11930;HAQ00_04715;OFC29924.1;HAP98_03445;HAP96_14410;HAP99_05825;HF288_12510;QER43448.1;AUW32210.1;OFC62314.1;AEK57501.1;HAQ02_05975;OFC39491.1;OFC39198.1;HFU97_06730;HFU84_00405;HFU87_02225;HFQ13_09935;HFU75_03770;HFV00_12710;RNF59625.1;ACK80321.1;PZD81714.1;ACH83409.1;WP_012536531.1;HF282_11360;fig|6666666.521345.peg.4010;HMI48_14325;HF290_09…	.
35	fabI	enoyl-[acyl-carrier protein] reductase I [EC:1.3.1.9 1.3.1.10]	Metabolism; Lipid metabolism; Fatty acid biosynthesis | Metabolism; Metabolism of cofactors and vitamins; Biotin metabolism | Metabolism; Biosynthesis of other secondary metabolites; Prodigiosin biosynthesis | Brite Hierarchies; Protein families: metabolism; Lipid biosynthesis proteins	K00208	52	1	1	1	1	1	1	1	1	1	1	1	1	1	1	HF281_02745;AIA56137.1;HAP97_13320;HFV02_02370;HAQ03_08680;HAQ00_07135;OFC29758.1;HAP98_07980;HAP96_10820;HAP99_04875;HF288_10145;QER44377.1;AUW33486.1;OFC44539.1;AEK59093.1;HAQ02_09855;OFC39533.1;OFC41824.1;HFU97_01770;HFU84_14105;HFU87_04470;HFQ13_01290;HFU75_10500;HFV00_05355;RNF62868.1;ACK78487.1;PZD82582.1;ACH82836.1;WP_163056644.1;HF282_14280;HMI48_17290;EGQ61400.1;WP_009562995.1;HF290_1293…	.
93	ribE	riboflavin synthase [EC:2.5.1.9]	Metabolism; Metabolism of cofactors and vitamins; Riboflavin metabolism	K00793	5	1	1	1	1	1	1	1	1	1	1	1	1	1	1	HF281_06235;AIA54476.1;HAP97_11255;HFV02_08820;HAQ03_06230;HAQ00_03725;OFC32950.1;HAP98_13525;HAP96_00505;HAP99_07475;HF288_04410;QER45847.1;AUW31987.1;OFC56798.1;AEK57232.1;HAQ02_00170;OFC39899.1;OFC40125.1;HFU97_03355;HFU84_05355;HFU87_03200;HFQ13_09545;HFU75_04325;HFV00_08670;RNF60930.1;ACK78922.1;PZD82686.1;ACH82728.1;WP_163058592.1;HF282_16165;fig|6666666.521345.peg.4182;HMI48_17885;EGQ60594…	.
29	ddl	D-alanine-D-alanine ligase [EC:6.3.2.4]	Metabolism; Metabolism of other amino acids; D-Alanine metabolism | Metabolism; Glycan biosynthesis and metabolism; Peptidoglycan biosynthesis | Human Diseases; Drug resistance: Antimicrobial; Vancomycin resistance | Brite Hierarchies; Protein families: metabolism; Peptidoglycan biosynthesis and degradation proteins	K01921	37	1	1	1	1	1	1	1	1	1	1	1	1	1	1	HF283_14245;HF292_07135;HF292_12580;OYV72899.1;HF281_02300;AIA56354.1;HAP97_00105;HFV02_10900;HAQ03_03550;HAQ00_06520;OFC35303.1;HAP98_02740;HAP96_07750;HAP99_10170;HF288_12210;QER43593.1;AUW33690.1;OFC62978.1;AEK59310.1;HAQ02_13510;OFC35936.1;OFC37907.1;HFU97_10375;HFU84_10450;HFU87_12745;HFQ13_05945;HFU75_13955;HFV00_07365;RNF57872.1;ACK78050.1;PZD82774.1;ACH82636.1;WP_163058737.1;HF282_03940;f…	.
42	gst	glutathione S-transferase [EC:2.5.1.18]	Metabolism; Metabolism of other amino acids; Glutathione metabolism | Metabolism; Xenobiotics biodegradation and metabolism; Metabolism of xenobiotics by cytochrome P450 | Metabolism; Xenobiotics biodegradation and metabolism; Drug metabolism - cytochrome P450 | Metabolism; Xenobiotics biodegradation and metabolism; Drug metabolism - other enzymes | Human Diseases; Cancers: Overview; Pathways in …	K00799	28	1	1	1	1	1	1	1	1	1	1	1	1	1	1	HF285_02920;HF285_04175;HF563_19510;NDU41842.1;HF563_03645;CDQ08800.1;SMH67001.1;HF563_14110;HF925_09980;HF925_12580;CDQ09049.1;SMH65620.1;HF281_02370;AIA56368.1;HAQ00_06590;HF288_12280;QER43579.1;AUW33704.1;OFC61259.1;AEK59324.1;HFU97_00135;HFU84_03330;HFU87_05160;HFQ13_10190;HFU75_08270;HFV00_03615;RNF59897.1;ACK78018.1;PZD82693.1;ACH82721.1;WP_163058602.1;HF282_16200;fig|6666666.521345.peg.417…	.
23	spoT	GTP diphosphokinase / guanosine-3',5'-bis(diphosphate) 3'-diphosphatase [EC:2.7.6.5 3.1.7.2]	Metabolism; Nucleotide metabolism; Purine metabolism | Brite Hierarchies; Protein families: genetic information processing; Ribosome biogenesis	K01139	65	1	1	1	1	1	1	1	1	1	1	1	1	1	1	HAP94_13110;OYV72994.1;HF281_02565;AIA55810.1;HAP97_01845;HFV02_09270;HAQ03_09710;HAQ00_12020;OFC36658.1;HAP98_04335;HAP96_02690;HAP99_02280;HF288_10915;QER43782.1;AUW33170.1;OFC61449.1;AEK58615.1;HAQ02_05365;OFC38945.1;OFC39679.1;HFU97_02770;HFU84_01145;HFU87_01275;HFQ13_11650;HFU75_03080;HFV00_04395;RNF67135.1;ACK79149.1;PZD82938.1;ACH82970.1;WP_163058004.1;HF282_07330;fig|6666666.521345.peg.50…	.
34	dut	dUTP pyrophosphatase [EC:3.6.1.23]	Metabolism; Nucleotide metabolism; Pyrimidine metabolism | Metabolism; Xenobiotics biodegradation and metabolism; Drug metabolism - other enzymes | Brite Hierarchies; Protein families: genetic information processing; DNA repair and recombination proteins	K01520	4	1	1	1	1	1	1	1	1	1	1	1	1	1	1	HF561_04865;HF281_00440;AIA56188.1;HAP97_05140;HFV02_03005;HAQ03_04380;HAQ00_05690;OFC36678.1;HAP98_13695;HAP96_07135;HAP99_12675;HF288_03550;QER43954.1;AUW33532.1;OFC43656.1;AEK59145.1;HAQ02_11000;OFC30508.1;OFC38565.1;HFU97_02290;HFU84_09685;HFU87_14385;HFQ13_04670;HFU75_04100;HFV00_13590;RNF60753.1;ACK79784.1;PZD82636.1;ACH82780.1;WP_163059278.1;HF282_06825;fig|6666666.521345.peg.4797;HMI48_17…	.
40	K09700	uncharacterized protein	Not Included in Pathway or Brite; Poorly characterized; Function unknown	K09700	32	1	1	1	1	1	1	1	1	1	1	1	1	1	1	HF281_12325;AIA54823.1;HAP97_00530;HFV02_11425;HAQ03_09550;HAQ00_07890;OFC28395.1;HAP98_03860;HAP96_10145;HAP99_08475;HF288_04020;QER43651.1;AUW32311.1;OFC62381.1;AEK57613.1;HAQ02_03405;OFC36031.1;OFC35755.1;HFU97_07790;HFU84_02000;HFU87_02980;HFQ13_13395;HFU75_05725;HFV00_02795;RNF59901.1;ACK79274.1;PZD80054.1;ACH84198.1;WP_163059006.1;HF282_17450;fig|6666666.521345.peg.309;HMI48_04195;EGQ61587.…	.
33	duf502	DUF502 domain-containing protein	Not Included in Pathway or Brite; Poorly characterized; General function prediction only	COG2928	56	1	1	1	1	1	1	1	1	1	1	1	1	1	1	HF281_11835;AIA54310.1;HAP97_03580;HFV02_07070;HAQ03_12835;HAQ00_02825;OFC35204.1;HAP98_02550;HAP96_02065;HAP99_02900;HF288_11695;QER44434.1;AUW31832.1;OFC48457.1;AEK57044.1;HAQ02_10010;OFC36336.1;OFC40536.1;HFU97_12955;HFU84_11150;HFU87_03335;HFQ13_00380;HFU75_04645;HFV00_00570;RNF58132.1;ACK80237.1;PZD82559.1;ACH82861.1;WP_009567324.1;HF282_19660;HMI48_17165;WP_009567324.1;HF290_17970;WP_009567…	.
45	hadIA	HAD-IA family hydrolase	Not Included in Pathway or Brite; Poorly characterized; General function prediction only	K01838;K05342	63	1	1	1	1	1	1	1	1	1	1	1	1	1	1	HF281_07090;AIA55271.1;HAP97_01620;HFV02_00400;HAQ03_00345;HAQ00_09415;OFC38234.1;HAP98_11340;HAP96_11315;HAP99_08890;HF288_14110;QER45743.1;AUW32912.1;OFC61223.1;AEK58304.1;HAQ02_07955;OFC30431.1;OFC41327.1;HFU97_06310;HFU84_13650;HFU87_13755;HFQ13_14145;HFU75_01265;HFV00_01175;RNF59528.1;ACK78615.1;PZD81704.1;ACH83420.1;WP_163054634.1;HF282_01730;HMI48_14270;WP_012536540.1;HF290_09915;WP_012536…	.
48	hflD	high frequency lysogenization protein	Not Included in Pathway or Brite; Poorly characterized; General function prediction only	K07153	80	1	1	1	1	1	1	1	1	1	1	1	1	1	1	HF283_00545;HF281_07295;AIA55311.1;HAP97_06840;HFV02_12785;HAQ03_00530;HAQ00_04330;OFC29589.1;HAP98_14795;HAP96_01185;HAP99_05475;HF288_00160;QER45779.1;AUW32946.1;OFC52080.1;AEK58342.1;HAQ02_11675;OFC36101.1;OFC39842.1;HFU97_06350;HFU84_13690;HFU87_13795;HFQ13_14185;HFU75_01225;HFV00_01215;RNF75559.1;ACK78503.1;PZD81934.1;ACH83284.1;WP_163056014.1;HF282_12395;fig|6666666.521345.peg.2751;HMI48_14…	.
30	hyp	membrane protein	Not Included in Pathway or Brite; Poorly characterized; General function prediction only	K07058	-	1	1	1	1	1	1	1	1	1	1	1	1	1	1	HF568_11720;HF921_07425;HF281_03925;AIA54868.1;HAP97_08755;HFV02_07240;HAQ03_01090;HAQ00_05100;OFC39171.1;HAP98_07505;HAP96_13275;HAP99_00900;HF288_01800;QER43751.1;AUW32350.1;OFC63258.1;AEK57659.1;OFC39812.1;OFC39627.1;HFU97_03115;HFU84_01490;HFU87_01620;HFQ13_12640;HFU75_02600;HFV00_02240;RNF59629.1;ACK80472.1;PZD79769.1;ACH83799.1;WP_163055254.1;fig|6666666.521345.peg.868;HMI48_02150;WP_012536…	.
51	hyp	hypothetical protein	Not Included in Pathway or Brite; Poorly characterized; General function prediction only	TIGR04495	62	1	1	1	1	1	1	1	1	1	1	1	1	1	1	HF281_09265;AIA55943.1;HAP97_04325;HFV02_05470;HAQ03_13270;HAQ00_15415;OFC29849.1;HAP98_09570;HAP96_00070;HAP99_11470;HF288_09540;QER44238.1;AUW33307.1;OFC51901.1;AEK58895.1;HAQ02_00830;OFC35136.1;OFC40269.1;HFU97_09620;HFU84_05750;HFU87_06420;HFQ13_03560;HFU75_11225;HFV00_10095;RNF60915.1;ACK78069.1;PZD82274.1;ACH83051.1;WP_163054912.1;HF282_17075;HMI48_16215;WP_012536263.1;HF290_09540;WP_012536…	.
69	nifU	NifU-like protein	Not Included in Pathway or Brite; Unclassified: metabolism; Energy metabolism	K19168	26	1	1	1	1	1	1	1	1	1	1	1	1	1	1	HF283_05335;HF563_19025;HF668_10615;RRN83733.1;HF563_07890;HF281_05650;AIA56462.1;HAP97_05765;HFV02_01925;HAQ03_12425;HAQ00_01650;OFC38261.1;HAP98_02905;HAP96_03815;HAP99_13115;HF288_07940;QER44251.1;AUW33789.1;OFC60619.1;AEK59420.1;HAQ02_09030;OFC39346.1;OFC41399.1;HFU97_07130;HFU84_04450;HFU87_08165;HFQ13_09095;HFU75_01565;HFV00_08360;RNF61053.1;ACK80090.1;PZD82838.1;ACH82553.1;WP_163055672.1;H…	.
101	aphC	thioredoxin family protein; alkyl hydroperoxide reductase	Not Included in Pathway or Brite; Unclassified: metabolism; Enzymes with EC numbers	COG1225	41	1	1	1	1	1	1	1	1	1	1	1	1	1	1	HF281_08060;AIA55355.1;HAP97_02875;HFV02_02705;HAQ03_00745;HAQ00_04115;OFC29521.1;HAP98_13145;HAP96_06685;HAP99_12210;HF288_10450;QER45958.1;AUW32983.1;OFC52787.1;AEK58387.1;HAQ02_08790;OFC30031.1;OFC35445.1;HFU97_08905;HFU84_12305;HFU87_07135;HFQ13_04315;HFU75_11980;HFV00_09380;RNF59243.1;ACK78731.1;PZD82471.1;ACH82959.1;WP_163057939.1;HF282_11730;HMI48_16680;WP_012536200.1;HF290_05265;WP_012536…	.
82	bcp	peroxiredoxin Q/BCP [EC:1.11.1.15]	Not Included in Pathway or Brite; Unclassified: metabolism; Enzymes with EC numbers	K03564	14	1	1	1	1	1	1	1	1	1	1	1	1	1	1	HF285_12935;OCB02904.1;WP_081662556.1;AEM46958.1;HF281_07105;AIA55269.1;HAP97_01605;HFV02_00415;HAQ03_00330;HAQ00_09430;OFC29701.1;HAP98_11325;HAP96_11300;HAP99_08905;HF288_14095;QER45741.1;AUW32910.1;OFC61226.1;AEK58302.1;HAQ02_07970;OFC30301.1;OFC41999.1;HFU97_06300;HFU84_13640;HFU87_13745;HFQ13_14135;HFU75_01275;HFV00_01165;RNF62866.1;ACK80434.1;PZD81702.1;ACH83422.1;WP_163054630.1;HF282_01720…	.
89	hflC	membrane protease subunit HflC [EC:3.4.-.-]	Not Included in Pathway or Brite; Unclassified: metabolism; Enzymes with EC numbers	K04087	71	1	1	1	1	1	1	1	1	1	1	1	1	1	1	HF281_08305;AIA55403.1;HAP97_02630;HFV02_06065;HAQ03_00990;HAQ00_03870;OFC29562.1;HAP98_08545;HAP96_06440;HAP99_10685;HF288_02445;QER45909.1;AUW33025.1;OFC50688.1;AEK58435.1;HAQ02_08545;OFC29990.1;OFC35488.1;HFU97_08125;HFU84_00580;HFU87_02400;HFQ13_10110;HFU75_03945;HFV00_12535;RNF60457.1;ACK80706.1;PZD81512.1;ACH83784.1;WP_163055231.1;HF282_04700;HMI48_02080;EGQ61174.1;WP_009562383.1;HF290_1511…	.
79	msrB	peptide-methionine (R)-S-oxide reductase [EC:1.8.4.12]	Not Included in Pathway or Brite; Unclassified: metabolism; Enzymes with EC numbers	K07305	9	1	1	1	1	1	1	1	1	1	1	1	1	1	1	HF281_01865;AIA54171.1;HAP97_02090;HFV02_06440;HAQ03_01245;HAQ00_14420;OFC33582.1;HAP98_06260;HAP96_11455;HAP99_03610;HF288_08440;QER44036.1;AUW31702.1;OFC52746.1;AEK56904.1;HAQ02_12530;OFC30089.1;OFC37510.1;HFU97_12395;HFU84_01705;HFU87_13025;HFQ13_04820;HFU75_12425;HFV00_00070;RNF59715.1;ACK79278.1;PZD81150.1;ACH84752.1;WP_163058488.1;HF282_14660;fig|6666666.521345.peg.2682;HMI48_08530;EGQ60538…	.
71	nudJ	phosphatase NudJ [EC:3.6.1.-]	Not Included in Pathway or Brite; Unclassified: metabolism; Enzymes with EC numbers	K12152	1	1	1	1	1	1	1	1	1	1	1	1	1	1	1	OYV74335.1;HF281_10910;AIA54666.1;HAP97_00925;HFV02_12270;HAQ03_04690;HAQ00_15930;OFC29907.1;HAP98_13630;HAP96_05145;HAP99_05190;HF288_09005;QER44130.1;AUW32171.1;OFC54768.1;AEK57456.1;HAQ02_05755;OFC39213.1;OFC35879.1;HFU97_13635;HFU84_04080;HFU87_08705;HFQ13_11410;HFU75_02840;HFV00_05630;RNF63317.1;ACK78140.1;PZD79827.1;ACH84053.1;WP_012537029.1;HF282_03345;fig|6666666.521345.peg.2609;HMI48_034…	.
91	pcm	protein-L-isoaspartate(D-aspartate) O-methyltransferase [EC:2.1.1.77]	Not Included in Pathway or Brite; Unclassified: metabolism; Enzymes with EC numbers	K00573	31	1	1	1	1	1	1	1	1	1	1	1	1	1	1	HF283_09860;HF283_17950;BBF65487.1;HF292_02715;BBF65486.1;HF281_01400;AIA54223.1;HAP97_13720;HFV02_11100;HAQ03_13985;HAQ00_02400;OFC37394.1;HAP98_07860;HAP96_13465;HAP99_06210;QER44521.1;AUW31751.1;AEK56957.1;HAQ02_11285;OFC37240.1;OFC40217.1;HFU97_04100;HFU84_09155;HFU87_10335;HFQ13_07020;HFU75_07210;HFV00_14480;RNF57842.1;ACK78171.1;PZD82539.1;ACH82883.1;WP_163056569.1;HF282_08645;fig|6666666.5…	.
95	ridA	2-iminobutanoate/2-iminopropanoate deaminase [EC:3.5.99.10]	Not Included in Pathway or Brite; Unclassified: metabolism; Enzymes with EC numbers	K09022	15	1	1	1	1	1	1	1	1	1	1	1	1	1	1	HER14_07285;WP_075324125.1;HAP95_16940;HF929_14910;AEM49238.1;OYV71783.1;HF281_02560;AIA55809.1;HAP97_01840;HFV02_09265;HAQ03_09715;HAQ00_12015;OFC36642.1;HAP98_04330;HAP96_02685;HAP99_02285;HF288_10910;QER43783.1;AUW33169.1;OFC61448.1;AEK58614.1;HAQ02_05370;OFC38933.1;OFC39663.1;HFU97_02775;HFU84_01150;HFU87_01280;HFQ13_11655;HFU75_03085;HFV00_04400;RNF67125.1;ACK79174.1;PZD82461.1;ACH82971.1;WP…	.
85	phoU	phosphate transport system protein	Not Included in Pathway or Brite; Unclassified: signaling and cellular processes; Others	K02039	2	1	1	1	1	1	1	1	1	1	1	1	1	1	1	HF281_11060;AIA54698.1;HAP97_14970;HFV02_12420;HAQ03_10400;HAQ00_04645;OFC29721.1;HAP98_08265;HAP96_14340;HAP99_05755;HF288_09155;QER43462.1;AUW32197.1;OFC62347.1;AEK57487.1;HAQ02_05905;OFC39504.1;OFC37680.1;HFU97_06660;HFU84_00335;HFU87_02155;HFQ13_09865;HFU75_03700;HFV00_12780;RNF59606.1;ACK79993.1;PZD81727.1;ACH83395.1;WP_163054669.1;HF282_03720;fig|6666666.521345.peg.4325;HMI48_14395;EGQ62977…	.
107	uspA	universal stress protein A	Not Included in Pathway or Brite; Unclassified: signaling and cellular processes; Signaling proteins	K06149	27	1	1	1	1	1	1	1	1	1	1	1	1	1	1	HF281_07010;AIA54619.1;HAP97_12320;HFV02_06655;HAQ03_01860;HAQ00_09005;OFC37807.1;HAP98_13040;HAP96_03295;HAP99_03525;HF288_01405;QER44338.1;AUW32106.1;OFC63147.1;AEK57360.1;HAQ02_13295;OFC35423.1;OFC37223.1;HFU97_02615;HFU84_00990;HFU87_01120;HFQ13_11495;HFU75_02925;HFV00_04240;RNF63518.1;ACK79894.1;PZD79863.1;ACH84013.1;WP_163056056.1;HF282_05975;fig|6666666.521345.peg.3468;HMI48_03225;EGQ62433…	.
75	lolA	outer membrane lipoprotein carrier protein	Not Included in Pathway or Brite; Unclassified: signaling and cellular processes; Structural proteins	K03634	81	1	1	1	1	1	1	1	1	1	1	1	1	1	1	OYV81287.1;HF281_08380;AIA56167.1;HAP97_08870;HFV02_14530;HAQ03_02385;HAQ00_05590;OFC36706.1;HAP98_04590;HAP96_05425;HAP99_12575;HF288_01950;QER43975.1;AUW33513.1;OFC44666.1;AEK59124.1;HAQ02_10900;OFC35083.1;OFC41411.1;HFU97_02390;HFU84_09785;HFU87_14285;HFQ13_04570;HFU75_04200;HFV00_13690;RNF64397.1;ACK80824.1;PZD82615.1;ACH82801.1;WP_163059314.1;HF282_02320;HMI48_17495;EGQ62361.1;WP_009566070.1…	.
73	ompH	outer membrane protein	Not Included in Pathway or Brite; Unclassified: signaling and cellular processes; Structural proteins	K06142	67	1	1	1	1	1	1	1	1	1	1	1	1	1	1	HF281_11120;AIA54710.1;HAP97_14910;HFV02_12480;HAQ03_11920;HAQ00_04705;OFC29710.1;HAP98_03455;HAP96_14400;HAP99_05815;HF288_09215;QER43450.1;AUW32208.1;OFC62312.1;AEK57499.1;HAQ02_05965;OFC39493.1;OFC37691.1;HFU97_06720;HFU84_00395;HFU87_02215;HFQ13_09925;HFU75_03760;HFV00_12720;RNF59623.1;ACK79822.1;PZD81716.1;ACH83407.1;WP_163054651.1;HF282_11350;fig|6666666.521345.peg.721;HMI48_14335;WP_012536…	.
22	clpB	ATP-dependent Clp protease ATP-binding subunit ClpB	Organismal Systems; Aging; Longevity regulating pathway - multiple species | Brite Hierarchies; Protein families: genetic information processing; Chaperones and folding catalysts	K03695	51	1	1	1	1	1	1	1	1	1	1	1	1	1	1	HAQ00_12595;HAQ00_12635;AEM48417.1;OYV72608.1;HF281_10345;AIA55836.1;HAP97_14080;HFV02_07760;HAQ03_09085;HAQ00_12800;OFC32295.1;HAP98_14055;HAP96_08250;HAP99_07820;HF288_08705;QER45071.1;AUW33213.1;OFC62252.1;AEK58800.1;HAQ02_13145;OFC39557.1;OFC39427.1;HFU97_04020;HFU84_08035;HFU87_03965;HFQ13_12970;HFU75_05300;HFV00_10260;RNF58259.1;ACK78387.1;PZD80001.1;ACH83860.1;WP_163057531.1;HF282_17400;fi…	.

## Sheet: Sheet1
	Supplementary Table 6. Supporting information of the Acidithiobacillia class-core marker genes occurrence patterns in genomes and MAGs of ‘Igneacidithiobacillus’ and selected markers used in comprehensive phylogenomic analysis of the group.
